# 1 Cohesin disrupts polycomb-dependent chromosome interactions

2 Rhodes JDP<sup>1\*</sup>, Feldmann A<sup>1\*</sup>, Hernández-Rodríguez B<sup>2\*</sup>, Díaz N<sup>2\*</sup>, Brown JM<sup>3</sup>,  
3 Fursova NA<sup>1</sup>, Blackledge NP<sup>1</sup>, Prathapan P<sup>1</sup>, Dobrinic P<sup>1</sup>, Huseyin M<sup>1</sup>,  
4 Szczurek A<sup>1</sup>, Kruse K<sup>2</sup>, Nasmyth KA<sup>1</sup>, Buckle VJ<sup>3</sup>, Vaquerizas JM<sup>2†</sup>, Klose RJ<sup>1†</sup>

5  
6 <sup>1</sup> Department of Biochemistry, University of Oxford, South Parks Road, Oxford, OX1  
7 3QU, UK.

8 <sup>2</sup> Max Planck Institute for Molecular Biomedicine, Roentgenstrasse 20, 48149,  
9 Muenster, Germany.

10 <sup>3</sup>MRC Molecular Haematology Unit, MRC Weatherall Institute of Molecular Medicine,  
11 Oxford University, Oxford, OX3 9DS, UK

12  
13 \* These authors contributed equally

14 † Corresponding authors

15

## 16 Abstract

17 How chromosome organisation is related to genome function remains poorly  
18 understood. Cohesin, loop-extrusion, and CTCF have been proposed to create  
19 structures called topologically associating domains (TADs) to regulate gene  
20 expression. Here, we examine chromosome conformation in embryonic stem cells  
21 lacking cohesin and find as in other cell types that cohesin is required to create TADs  
22 and regulate A/B compartmentalisation. However, in the absence of cohesin we  
23 identify a series of long-range chromosomal interactions that persist. These  
24 correspond to regions of the genome occupied by the polycomb repressive system,  
25 depend on PRC1, and we discover that cohesin counteracts these interactions. This  
26 disruptive activity is independent of CTCF and TADs, and regulates gene repression  
27 by the polycomb system. Therefore, in contrast to the proposal that cohesin creates  
28 structure in chromosomes, we discover a new role for cohesin in disrupting polycomb-  
29 dependent chromosome interactions to regulate gene expression.

## 30 Introduction

31 Spatial organisation of the genome influences gene transcription and other  
32 fundamental DNA-based processes. Recently, genome-wide chromosome  
33 conformation capture (Hi-C) has significantly advanced our understanding of  
34 chromosomal organisation (Rowley and Corces, 2018). This has shown that  
35 megabase-sized regions of chromosomes, which have similar transcriptional activity  
36 and chromatin modifications, tend to interact preferentially. When these interactions  
37 involve active regions of chromosomes they are referred to as A compartments and  
38 interactions between less active regions are referred to as B compartments  
39 (Lieberman-Aiden et al., 2009). At the sub-megabase scale, chromosomes are  
40 partitioned into topologically associating domains (TADs) which correspond to

41 contiguous regions of chromatin that interact more frequently than with chromatin  
42 outside the domain (Dixon et al., 2012; Nora et al., 2012; Rao et al., 2014). There is  
43 increasing evidence that TAD formation occurs through a process called loop  
44 extrusion. It has been proposed that cohesin can utilize its ATPase activity to extrude  
45 loops of chromatin and that this is limited or terminated by CTCF occupied insulator  
46 DNA elements (Fudenberg et al., 2016; Sanborn et al., 2015). This process is thought  
47 to structure and insulate chromosomes, limiting the effects of distal gene regulatory  
48 elements to genes within a given TAD. Indeed, alterations in TAD boundaries can lead  
49 to perturbed gene expression and human disease (Lupiáñez et al., 2015). Importantly,  
50 the function of cohesin in loop extrusion appears to be distinct from its essential and  
51 well characterised role in sister chromatid cohesion (Guacci et al., 1997; Michaelis et  
52 al., 1997).

53 Based on these observations, super-resolution chromosome imaging has been  
54 applied to test whether the organisational concepts which emerge from ensemble Hi-  
55 C experiments are also evident in single cells (Bintu et al., 2018; Finn et al., 2019;  
56 Miron et al., 2019). This has revealed contiguous globular chromosomal structures that  
57 are independent of cohesin and loop extrusion, and spatially heterogeneous amongst  
58 individual cells. Moreover, single cell Hi-C experiments indicate that interactions within  
59 TADs are infrequent (Flyamer et al., 2017). This suggests that TADs are not static  
60 structural entities, but result from tendencies to interact, which only become evident  
61 when averaged over a population of cells in ensemble Hi-C analysis.

62 If TADs are not fixed structural entities, then fundamental questions remain as to what  
63 roles cohesin and loop extrusion have in regulating interphase chromosome structure  
64 and function. Recent attempts to address these questions have proposed that cohesin  
65 regulates interactions between super-enhancers in cancer cells (Rao et al., 2017) and  
66 helps to actively guide distant enhancers to their target genes in somatic cells (Hadjur  
67 et al., 2009). However, to what extent these processes function in different cell types,  
68 how they are related to CTCF/TADs, and what role they play in gene regulation  
69 remains poorly defined.

70 To address these questions, we removed cohesin in mouse embryonic stem cells  
71 (ESCs) and examined chromosome interactions by Hi-C. We show that cohesin loss  
72 eliminates TADs and enhances A/B compartmentalisation as in other cell types.  
73 However, in the absence of cohesin we find that a series of long-range high frequency  
74 interactions corresponding to regions of the genome occupied by the polycomb  
75 repressive complexes (PRC1 and PRC2) persist. These interactions rely on PRC1 and  
76 interestingly, in the absence of cohesin, we discover that interactions between

77 polycomb chromatin domains are strengthened. Using single cell analysis we  
78 demonstrate that cohesin separates polycomb chromatin domains, explaining the  
79 effects observed by Hi-C. Removal of CTCF, and disruption of TADs, does not  
80 strengthen these interactions, revealing that cohesin counteracts the association of  
81 polycomb chromatin domains through mechanisms that are independent of TADs or  
82 insulation. Moreover, we find that increases in polycomb chromatin domain  
83 interactions following cohesin loss has functional consequences on gene expression.  
84 Together these discoveries reveal a new role for cohesin in disrupting polycomb  
85 dependent chromosome interactions and gene repression.

## 86 **Results**

### 87 **Cohesin-independent chromosomal interactions exist in ESCs**

88 We chose to study the loss of cohesin in ESCs because they are non-transformed,  
89 diploid, and have a wealth of existing genomic information characterising their  
90 chromosome structure and chromatin modifications. To do this we used  
91 CRISPR/Cas9-based genome engineering and developed an ESC line in which the  
92 cohesin subunit SCC1 (RAD21), could be rapidly removed via an auxin inducible  
93 degron (Natsume et al., 2016) (Figure 1A, B and S1A). This circumvented  
94 complications associated with the absence of cohesin during cell division and allowed  
95 us to examine the effects that loss of cohesin has on chromosome structure and  
96 function.

97 To examine chromosome interactions in the absence of cohesin we treated cells with  
98 auxin for 6 hours to allow the effects of cohesin loss to manifest and compared *in situ*  
99 Hi-C (Díaz et al., 2018; Rao et al., 2014) matrices from the SCC1 degron ESCs  
100 (SCC1<sup>DEG</sup>) and control ESCs. Consistent with previous findings (Rao et al., 2017;  
101 Schwarzer et al., 2017; Wutz et al., 2017), removal of cohesin caused a complete loss  
102 of TADs (Figure S1B and C) and modestly enhanced A/B compartmentalisation  
103 (Figure S1D). However, visual inspection of the Hi-C matrices also revealed numerous  
104 interactions that were evident in control cells and persisted in the absence of cohesin  
105 (Figure 1C). We then used computational approaches to identify these persistent  
106 interactions throughout the genome (Rao et al., 2014) and uncovered 336 sites of high  
107 interaction frequency in cohesin-depleted cells. Interestingly, when we examined  
108 whether there were any DNA binding factors or chromatin features associated with  
109 these interaction sites, there was a strong enrichment of proteins that form polycomb  
110 repressive complexes (PRC1 and PRC2) (Figure 1D). This association was further  
111 evident when the occupancy of PRC1, PRC2, and their histone modifications were  
112 examined at interaction sites (Figure 1E and S1E). The most enriched polycomb

113 protein at these sites was the PRC1 component RING1B. When we examined its  
114 occupancy in more detail, we found that 85% (287/336) of interactions had RING1B  
115 associated with at least one of the interaction sites and 65% (218/336) had RING1B  
116 at both interaction sites. Interestingly, these interactions tended to involve large  
117 polycomb chromatin domains, suggesting that the size of the domain may contribute  
118 to interaction frequency (Figure S1F). Therefore, removal of cohesin in ESCs leads to  
119 strengthening of A/B compartmentalisation and loss of TADs, but some strong  
120 chromosomal interactions persist and these correspond to regions of the chromosome  
121 occupied by the polycomb system.

### 122 **Polycomb mediates interactions that persist in the absence of cohesin**

123 In ESCs it is known that polycomb chromatin domains can associate with each other,  
124 even over very long distances (Bonev et al., 2017; Denholtz et al., 2013; Joshi et al.,  
125 2015; Schoenfelder et al., 2015). To determine whether sites that persisted in the  
126 absence of cohesin rely on the polycomb system for their formation, an AID tag was  
127 added to RING1B and the closely related and interchangeable paralogue, RING1A,  
128 was deleted (Figure 2A, B and S2A). We then treated cells for 6 hours with auxin to  
129 remove RING1B (RING1B<sup>DEG</sup>) and carried out *in situ* Hi-C. Examination of genomic  
130 distance-dependent contact probabilities and TADs following removal of PRC1  
131 revealed that these features were unaffected (Figure 2C and D) with minor increases  
132 in A/B compartmentalisation (Figure S2B). However, the interactions at sites that  
133 persisted in the absence of cohesin were lost from the Hi-C matrices (Figure 2E, F and  
134 S2C). Therefore, in ESCs, PRC1 contributes little to A/B compartmentalisation and  
135 TADs, but is responsible for long-range chromosomal interactions that also persist in  
136 the absence cohesin.

### 137 **Cohesin removal strengthens long-range polycomb chromatin domain** 138 **interactions**

139 In the absence of cohesin, we noticed that the interaction frequency between polycomb  
140 chromatin domains often appeared to increase in the Hi-C matrices, suggesting that  
141 cohesin may regulate these interactions (Figure 1C and 3A). Indeed, aggregate  
142 analysis of the interactions that persist in the absence of cohesin, and which we have  
143 shown rely on PRC1 to form, displayed a strong increase in interaction frequency  
144 (Figure 3B). Importantly, these effects did not result from increases in PRC1  
145 occupancy, as RING1B binding was similar, or even slightly lower, than in cells with  
146 normal cohesin levels (Figure 3C and D). Together this reveals that cohesin regulates  
147 polycomb chromatin domain interactions without affecting PRC1 occupancy.

148 To further explore polycomb-dependent interactions and their regulation by cohesin  
149 we used a technique called Capture-C that has an advantage over Hi-C in providing  
150 increased sensitivity and resolution for interrogating interactions at specific regions in  
151 the genome (Hughes et al., 2014). Using Capture-C we focussed on 18 genes that are  
152 associated with polycomb chromatin domains and examined their interactions  
153 following removal of cohesin. Interestingly, our analysis demonstrated that interactions  
154 between polycomb chromatin domains that are in close proximity tended to be  
155 unchanged or slightly reduced in the absence of cohesin (Figure 3E and F). In contrast,  
156 interactions that occurred over long distances, often between different TADs, showed  
157 increases in their interaction strength (Figure 3E and F). Importantly, these interactions  
158 were lost following PRC1 removal, demonstrating that they rely on intact polycomb  
159 chromatin domains (Figure S3A and B). This distance dependent effect was also  
160 evident when we examined interactions in our Hi-C analysis (Figure 3G). Therefore,  
161 cohesin has little effect on interactions between polycomb chromatin domains that are  
162 in close proximity on the chromosome, but counteracts interactions between polycomb  
163 chromatin domains separated by large distances.

#### 164 **Cohesin counteracts polycomb chromatin domain interactions independently of** 165 **TADs and insulation**

166 The effect of cohesin loss on polycomb chromatin domain interactions could be related  
167 to loss of TADs or alternatively TAD-independent processes. To distinguish between  
168 these possibilities, we carried out Capture-C in a cell line where TADs are disrupted  
169 by removal of CTCF rather than removal of cohesin (Figure 4A and B and S4) (Nora et  
170 al., 2017). In contrast to the loss of cohesin, removal of CTCF did not strengthen distal  
171 polycomb chromatin domain interactions (Figure 4D and E). This was also evident  
172 when we examined the interactions that persisted in the absence of cohesin after  
173 CTCF removal using Hi-C (Nora et al., 2017) (Figure 4C and F). Therefore, cohesin  
174 counteracts polycomb chromatin domain interactions through a process that is  
175 independent of CTCF and TADs.

#### 176 **Polycomb chromatin domain interactions are disrupted by cohesin**

177 Chromosome conformation capture-based approaches are extremely sensitive and  
178 can identify infrequent interaction events like those that lead to the emergence of TADs  
179 in ensemble Hi-C analysis. However, neither Hi-C nor Capture-C reveal the absolute  
180 frequency of these interactions. Therefore, to characterise polycomb chromatin  
181 domain interactions and define the extent to which cohesin regulates these, we set out  
182 to measure interactions in single cells. We focused on a pair of genes (*HoxD10* and  
183 *Dlx2*) with polycomb chromatin domains that showed increased interaction in Hi-C

184 (Figure 1C) and Capture-C (Figure 5A) after cohesin removal. We generated probes  
185 that uniquely mark the *HoxD10* and *Dlx2* genes and performed non-denaturing  
186 RASER-FISH (Brown et al., 2018) to measure the three-dimensional distance between  
187 these loci in individual cells (Figure 5B and S5C). This revealed a distribution of  
188 distances between *HoxD10* and *Dlx2* in cells where cohesin is intact, including some  
189 in close proximity (Figure 5C and S5D). When cohesin was removed, the number of  
190 very close distances became larger, in agreement with increased contact probabilities  
191 between polycomb chromatin domains observed in Hi-C and Capture-C (Figure 3).  
192 Importantly, to test whether this was dependent on both the inactivation of cohesin and  
193 the presence of PRC1, we developed a double degron line where SCC1 and RING1B  
194 were degraded simultaneously by addition of auxin (Figure S5A). Capture-C in this line  
195 revealed a loss of interaction between *HoxD10* and *Dlx2* (Figure S5B). Similarly, in the  
196 absence of both cohesin and PRC1 the number of very close distances between  
197 *HoxD10* and *Dlx2* in FISH was greatly reduced (Figure 5C). Importantly, similar effects  
198 were observed when we examined the interaction of polycomb chromatin domains  
199 associated with the *Nkx2-3* and *Pax2* genes (Figure S6). Together this demonstrates  
200 that cohesin counteracts polycomb chromatin domain association in single cells.

201 Previous studies have reported that loci which display strong interactions in Hi-C do  
202 not always equate to frequent interactions in single cells (Bonev et al., 2017;  
203 Fudenberg and Imakaev, 2017). Therefore we wanted to accurately quantitate the  
204 frequency of polycomb chromatin domain interactions by determining the number of  
205 FISH probe measures that may be considered to be in contact (Cattoni et al., 2017).  
206 This revealed that *HoxD10* and *Dlx2* polycomb chromatin domains were in contact  
207 (closer than 187nm) 2% of the time (Figure 5D). Following cohesin removal, the  
208 contact frequency increased to 5.6% indicating that when cohesin is present it  
209 functions to disrupt interactions between regions of chromatin occupied by the  
210 polycomb repressive system. Importantly, this increased association between  
211 polycomb chromatin domains was dependent on cohesin and PRC1, as their  
212 simultaneous removal reduced the interaction frequency to 0.7%. Again, we observed  
213 very similar interaction frequencies when we examined the polycomb chromatin  
214 domains associated with the *Nkx2-3* and *Pax2* genes (Figure S6C). It is also important  
215 to point out that these interaction values likely underestimate the absolute frequency  
216 with which polycomb chromatin domains interact with one another, as interactions  
217 between specific pairs of sites are likely to vary between individual cells. Although this  
218 potential underestimation is not accounted for in FISH analysis, it is consistent with  
219 imaging of polycomb proteins in ESCs where hundreds of cytologically distinct foci that

220 house polycomb occupied genes, called polycomb bodies are evident (Isono et al.,  
221 2013). Together these single cell measurements quantitate the frequency with which  
222 polycomb chromatin domains interact in single cells and demonstrate that cohesin  
223 disrupts polycomb chromatin domain interactions.

#### 224 **Increased polycomb chromatin domain association in the absence of cohesin** 225 **supresses gene expression**

226 In vertebrates, polycomb repressive complexes play important roles in maintaining the  
227 repression of genes in cell types where they should not be expressed  
228 (Schuettengruber et al., 2017). This is proposed to rely on chromatin modifications  
229 and, in some instances, on the formation of polycomb-dependent chromatin  
230 interactions (Eskeland et al., 2010; Kundu et al., 2017). Here we demonstrate that  
231 cohesin counteracts and disrupts long-range interactions between polycomb  
232 chromatin domains and their associated genes. We were therefore interested to test  
233 whether cohesin affects polycomb-mediated gene repression. To examine this  
234 possibility we performed calibrated RNA-Seq (cRNA-seq) before and after cohesin  
235 removal. In agreement with previous analysis following cohesin depletion, changes in  
236 gene expression were modest and the transcription of only several hundred genes was  
237 significantly altered (Rao et al., 2017) (Figure 6A). Nevertheless, we also observed a  
238 more subtle and widespread reduction in gene transcription in agreement with a  
239 proposed role for cohesin in supporting promoter-enhancer interactions and gene  
240 expression (Hadjur et al., 2009; Schwarzer et al., 2017). Remarkably, however,  
241 RING1B-bound genes were overrepresented (251/365) among the genes whose  
242 expression was significantly reduced, indicating that they were disproportionately  
243 affected (Figure 6B). A more detailed analysis of polycomb bound genes with  
244 detectable expression (Figure S7A) in our cRNA-seq showed that reductions in  
245 expression were larger in magnitude following cohesin removal if the gene interacted  
246 with another polycomb chromatin domain (Figure 6C and D). Together these  
247 observations reveal that cohesin, and presumably its loop extruding activity, play a  
248 direct role in counteracting long-range polycomb chromatin domain interactions and  
249 gene repression.

#### 250 **Discussion**

251 How cohesin functions to shape chromosome structure and function remains poorly  
252 understood. Here, using degron alleles and chromosome conformation capture  
253 approaches, we identify a series of long-range interactions that persist in the absence  
254 of cohesin and correspond to polycomb chromatin domains (Figure 1). We  
255 demonstrate that PRC1 is essential for the formation of these interactions (Figure 2).

256 Remarkably, in the absence of cohesin, polycomb chromatin domain interactions are  
257 strengthened, revealing that they are normally counteracted by cohesin (Figure 3).  
258 Importantly, cohesin regulates these interactions independently of CTCF and TADs  
259 (Figure 4). Using cellular imaging we visualise polycomb chromatin domain  
260 interactions, quantify their frequency, and further demonstrate a role for cohesin in  
261 separating polycomb chromatin domains and regulating their interaction in single cells  
262 (Figure 5). Finally, we demonstrate that regulation of polycomb chromatin domain  
263 interactions by cohesin affects gene expression (Figure 6). These findings reveal a  
264 new link between the capacity of the polycomb system to form long-range  
265 transcriptionally repressive chromosome interactions, and cohesin which appears to  
266 actively counteract and regulate this process (Figure 7).

267 Initially these observations may seem counterintuitive. Why would it be advantageous  
268 for a cell to disrupt chromosomal interactions, like those formed between polycomb  
269 chromatin domains, which function to protect against inappropriate gene expression?  
270 One simple explanation may be that, if left unchecked, progressive association and  
271 possibly compartmentalisation by factors which nucleate and promote repressive  
272 chromatin interactions could lead to an irreversibly silent state. This may be particularly  
273 pertinent in the case of the polycomb system, as recently components of PRC1 have  
274 been shown to phase separate, and this has been linked to selective exclusion of gene  
275 regulatory factors (Plys et al., 2018; Tatavosian et al., 2019). In pluripotent cells, or at  
276 early developmental stages, such a static situation could be deleterious, as many  
277 genes occupied by polycomb chromatin domains and which engage in long-range  
278 interactions must be expressed later in development. It is tempting to speculate that  
279 cohesin primarily functions on interphase chromosomes to counteract the potential for  
280 such stasis by periodically breaking up self-associating structures and in doing so  
281 provide an opportunity for factors in the nucleus to constantly sample these regions of  
282 the genome should they be required for future gene expression programmes.

283 Interestingly, interactions between super-enhancers in cancer cells were previously  
284 shown to occur independently of cohesin and these elements also appear to have a  
285 tendency to phase separate (Sabari et al., 2018). Similar to the increased association  
286 we observe between polycomb chromatin domains, long-range super-enhancer  
287 associations were also increased following cohesin removal (Rao et al., 2017).  
288 Conceptually aligned with the idea that cohesin and loop extrusion may counteract  
289 polycomb chromatin domain interactions to mitigate stasis, one could envisage how  
290 periodically disrupting super-enhancer associations and possibly their interactions with  
291 gene promoters might support a constant re-evaluation of gene regulatory interactions.



292 Again, this could provide an opportunity for plasticity in transitioning between gene  
293 expression programmes.

294 As chromosomal interactions are studied in more detail it is becoming evident that  
295 TADs do not correspond to fixed or invariant structures in single cells. Instead, they  
296 appear to emerge in ensemble Hi-C analysis from low frequency tendencies to interact  
297 across many cells. Spatially heterogeneous globular chromatin structures, similar in  
298 size to TADs, are evident in single cells, but form independently of cohesin. This  
299 indicates that cohesin and loop extrusion do not primarily function to create structure  
300 in chromosomes. In agreement with these observations, our results would argue that  
301 cohesin and loop extrusion instead disrupt chromatin interactions through constantly  
302 separating regions of chromatin and increasing chromosomal dynamics. This may rely  
303 on the topological manner in which entrapped chromatin would extrude through the  
304 cohesin complex, however translocation of cohesin through polycomb domains by  
305 other mechanisms could also disrupt interactions. We envisage that loading of cohesin  
306 on the chromosome in proximity to a polycomb chromatin domain, followed by loop  
307 extrusion, could break up interactions with other polycomb chromatin domains,  
308 irrespective of whether they are separated by large distance on the chromosome or  
309 even between chromosomes. This would also explain why CTCF and its proposed  
310 activity in halting extrusion would not affect the ability of cohesin to counteract  
311 polycomb chromatin domain interactions as we observe. Instead, CTCF and  
312 termination of loop extrusion, may function to restrict the activity of gene regulatory  
313 elements to regions between CTCF sites by limiting mixing of chromatin that might  
314 result from unconstrained loop extrusion.

315 Finally, cohesin is best characterised for the role it plays in holding sister chromatids  
316 together after replication and during cell division. In contrast, other SMC complexes,  
317 for example bacterial SMC-ScpAB and eukaryotic condensin, have been proposed to  
318 play roles in separating chromosomes through processes that are thought to rely on  
319 loop extrusion (Goloborodko et al., 2016; Nasmyth, 2001; Wang et al., 2017). Our  
320 observations provide new evidence to suggest that in addition to its role in sister  
321 chromatid cohesion, cohesin also retains its primordial SMC complex activity in  
322 separating regions of chromosomes as is evident from the role it plays in disrupting  
323 long-range polycomb chromatin domain interactions.

## 324 **Acknowledgements**

325 We would like to thank Elphège Nora and Benoit Bruneau for providing the CTCF  
326 degron cell line. We would like to thank Neil Brockdorff and Francis Barr for providing  
327 comments on the manuscript. We are grateful to Amanda Williams at the Department

328 of Zoology, Oxford, for sequencing support on the NextSeq 500. We are grateful to  
329 Jim Hughes, Damien Downes and Priscila Hirschfeld for providing advice, protocols  
330 and probes for Capture-C prior to publication.

### 331 **Funding**

332 Work in the Klose lab is supported by the Wellcome Trust, the European Research  
333 Council, and the Lister Institute of Preventive Medicine. A. F. is supported by a Sir  
334 Henry Wellcome Trust Fellowship. Work in the Nasmyth Lab is supported by the  
335 Wellcome Trust, Cancer Research UK and the European Research Council. Work in  
336 the Vaquerizas lab is supported by the Max Planck Society. Work in the Buckle Lab is  
337 supported by MRC and the Wolfson Imaging Centre Oxford by the Wolfson  
338 Foundation, joint MRC/BBSRC/EPSRC and the Wellcome Trust.

### 339 **References**

- 340 Bintu, B., Mateo, L.J., Su, J.-H., Sinnott-Armstrong, N.A., Parker, M., Kinrot, S.,  
341 Yamaya, K., Boettiger, A.N., Zhuang, X., 2018. Super-resolution chromatin  
342 tracing reveals domains and cooperative interactions in single cells. *Science* 362,  
343 eaau1783. doi:10.1126/science.aau1783
- 344 Bonev, B., Mendelson Cohen, N., Szabo, Q., Fritsch, L., Papadopoulos, G.L.,  
345 Lubling, Y., Xu, X., Lv, X., Hugnot, J.-P., Tanay, A., Cavalli, G., 2017. Multiscale  
346 3D Genome Rewiring during Mouse Neural Development. *Cell* 171, 557–  
347 572.e24. doi:10.1016/j.cell.2017.09.043
- 348 Brown, J.M., Roberts, N.A., Graham, B., Waithe, D., Lagerholm, C., Telenius, J.M.,  
349 De Ornellas, S., Oudelaar, A.M., Scott, C., Szczerbal, I., Babbs, C., Kassouf,  
350 M.T., Hughes, J.R., Higgs, D.R., Buckle, V.J., 2018. A tissue-specific self-  
351 interacting chromatin domain forms independently of enhancer-promoter  
352 interactions. *Nat Commun* 9, 3849. doi:10.1038/s41467-018-06248-4
- 353 Cattoni, D.I., Cardozo Gizzi, A.M., Georgieva, M., Di Stefano, M., Valeri, A.,  
354 Chamousset, D., Houbbron, C., Déjardin, S., Fiche, J.-B., González, I., Chang, J.-  
355 M., Sexton, T., Marti-Renom, M.A., Bantignies, F., Cavalli, G., Nollmann, M.,  
356 2017. Single-cell absolute contact probability detection reveals chromosomes are  
357 organized by multiple low-frequency yet specific interactions. *Nat Commun* 8,  
358 1753. doi:10.1038/s41467-017-01962-x
- 359 Denholtz, M., Bonora, G., Chronis, C., Splinter, E., de Laat, W., Ernst, J., Pellegrini,  
360 M., Plath, K., 2013. Long-range chromatin contacts in embryonic stem cells  
361 reveal a role for pluripotency factors and polycomb proteins in genome  
362 organization. *Cell Stem Cell* 13, 602–616. doi:10.1016/j.stem.2013.08.013
- 363 Dixon, J.R., Selvaraj, S., Yue, F., Kim, A., Li, Y., Shen, Y., Hu, M., Liu, J.S., Ren, B.,  
364 2012. Topological domains in mammalian genomes identified by analysis of  
365 chromatin interactions. *Nature* 485, 376–380. doi:10.1038/nature11082
- 366 Díaz, N., Kruse, K., Erdmann, T., Staiger, A.M., Ott, G., Lenz, G., Vaquerizas, J.M.,  
367 2018. Chromatin conformation analysis of primary patient tissue using a low  
368 input Hi-C method. *Nat Commun* 9, 4938. doi:10.1038/s41467-018-06961-0
- 369 Eskeland, R., Leeb, M., Grimes, G.R., Kress, C., Boyle, S., Sproul, D., Gilbert, N.,  
370 Fan, Y., Skoultchi, A.I., Wutz, A., Bickmore, W.A., 2010. Ring1B compacts  
371 chromatin structure and represses gene expression independent of histone  
372 ubiquitination. *Mol. Cell* 38, 452–464. doi:10.1016/j.molcel.2010.02.032
- 373 Finn, E.H., Pegoraro, G., Brandão, H.B., Valton, A.-L., Oomen, M.E., Dekker, J.,  
374 Mirny, L., Misteli, T., 2019. Extensive Heterogeneity and Intrinsic Variation in  
375 Spatial Genome Organization. *Cell*. doi:10.1016/j.cell.2019.01.020

- 376 Flyamer, I.M., Gassler, J., Imakaev, M., Brandão, H.B., Ulianov, S.V., Abdennur, N.,  
377 Razin, S.V., Mirny, L.A., Tachibana-Konwalski, K., 2017. Single-nucleus Hi-C  
378 reveals unique chromatin reorganization at oocyte-to-zygote transition. *Nature*  
379 544, 110–114. doi:10.1038/nature21711
- 380 Fudenberg, G., Imakaev, M., 2017. FISH-ing for captured contacts: towards  
381 reconciling FISH and 3C. *Nat Meth* 14, 673–678. doi:10.1038/nmeth.4329
- 382 Fudenberg, G., Imakaev, M., Lu, C., Goloborodko, A., Abdennur, N., Mirny, L.A.,  
383 2016. Formation of Chromosomal Domains by Loop Extrusion. *Cell Rep* 15,  
384 2038–2049. doi:10.1016/j.celrep.2016.04.085
- 385 Goloborodko, A., Imakaev, M.V., Marko, J.F., Mirny, L., 2016. Compaction and  
386 segregation of sister chromatids via active loop extrusion. *Elife* 5, 11202.  
387 doi:10.7554/eLife.14864
- 388 Guacci, V., Koshland, D., Strunnikov, A., 1997. A direct link between sister chromatid  
389 cohesion and chromosome condensation revealed through the analysis of MCD1  
390 in *S. cerevisiae*. *Cell* 91, 47–57. doi:doi:10.1016/S0092-8674(01)80008-8
- 391 Hadjur, S., Williams, L.M., Ryan, N.K., Cobb, B.S., Sexton, T., Fraser, P., Fisher,  
392 A.G., Merckenschlager, M., 2009. Cohesins form chromosomal cis-interactions at  
393 the developmentally regulated IFNG locus. *Nature* 460, 410–413.  
394 doi:10.1038/nature08079
- 395 Hughes, J.R., Roberts, N., McGowan, S., Hay, D., Giannoulatou, E., Lynch, M., De  
396 Gobbi, M., Taylor, S., Gibbons, R., Higgs, D.R., 2014. Analysis of hundreds of  
397 cis-regulatory landscapes at high resolution in a single, high-throughput  
398 experiment. *Nat. Genet.* 46, 205–212. doi:10.1038/ng.2871
- 399 Isono, K., Endo, T.A., Ku, M., Yamada, D., Suzuki, R., Sharif, J., Ishikura, T.,  
400 Toyoda, T., Bernstein, B.E., Koseki, H., 2013. SAM domain polymerization links  
401 subnuclear clustering of PRC1 to gene silencing. *Dev. Cell* 26, 565–577.  
402 doi:10.1016/j.devcel.2013.08.016
- 403 Joshi, O., Wang, S.-Y., Kuznetsova, T., Atlasi, Y., Peng, T., Fabre, P.J., Habibi, E.,  
404 Shaik, J., Saeed, S., Handoko, L., Richmond, T., Spivakov, M., Burgess, D.,  
405 Stunnenberg, H.G., 2015. Dynamic Reorganization of Extremely Long-Range  
406 Promoter-Promoter Interactions between Two States of Pluripotency. *Cell Stem*  
407 *Cell* 17, 748–757. doi:10.1016/j.stem.2015.11.010
- 408 Kundu, S., Ji, F., Sunwoo, H., Jain, G., Lee, J.T., Sadreyev, R.I., Dekker, J.,  
409 Kingston, R.E., 2017. Polycomb Repressive Complex 1 Generates Discrete  
410 Compacted Domains that Change during Differentiation. *Mol. Cell* 65, 432–  
411 446.e5. doi:10.1016/j.molcel.2017.01.009
- 412 Lieberman-Aiden, E., van Berkum, N.L., Williams, L., Imakaev, M., Ragozy, T.,  
413 Telling, A., Amit, I., Lajoie, B.R., Sabo, P.J., Dorschner, M.O., Sandstrom, R.,  
414 Bernstein, B., Bender, M.A., Groudine, M., Gnirke, A., Stamatoyannopoulos, J.,  
415 Mirny, L.A., Lander, E.S., Dekker, J., 2009. Comprehensive mapping of long-  
416 range interactions reveals folding principles of the human genome. *Science* 326,  
417 289–293. doi:10.1126/science.1181369
- 418 Lupiáñez, D.G., Kraft, K., Heinrich, V., Krawitz, P., Brancati, F., Klopocki, E., Horn,  
419 D., Kayserili, H., Opitz, J.M., Laxova, R., Santos-Simarro, F., Gilbert-Dussardier,  
420 B., Wittler, L., Borschiwer, M., Haas, S.A., Osterwalder, M., Franke, M.,  
421 Timmermann, B., Hecht, J., Spielmann, M., Visel, A., Mundlos, S., 2015.  
422 Disruptions of topological chromatin domains cause pathogenic rewiring of gene-  
423 enhancer interactions. *Cell* 161, 1012–1025. doi:10.1016/j.cell.2015.04.004
- 424 Michaelis, C., Ciosk, R., Nasmyth, K., 1997. Cohesins: chromosomal proteins that  
425 prevent premature separation of sister chromatids. *Cell* 91, 35–45.  
426 doi:10.1016/S0092-8674(01)80007-6
- 427 Miron, E., Oldenkamp, R., Pinto, D.M.S., Brown, J.M., Faria, A.R.C., Shaban, H.A.,  
428 Rhodes, J.D.P., Innocent, C., de Ornellas, S., Buckle, V., Schermelleh, L., 2019.  
429 Chromatin arranges in filaments of blobs with nanoscale functional zonation.  
430 bioRxiv 566638. doi:https://doi.org/10.1101/566638

- 431 Nasmyth, K., 2001. Disseminating the genome: joining, resolving, and separating  
432 sister chromatids during mitosis and meiosis. *Annu. Rev. Genet.* 35, 673–745.  
433 doi:10.1146/annurev.genet.35.102401.091334
- 434 Natsume, T., Kiyomitsu, T., Saga, Y., Kanemaki, M.T., 2016. Rapid Protein Depletion  
435 in Human Cells by Auxin-Inducible Degron Tagging with Short Homology  
436 Donors. *Cell Rep* 15, 210–218. doi:10.1016/j.celrep.2016.03.001
- 437 Nora, E.P., Goloborodko, A., Valton, A.-L., Gibcus, J.H., Uebersohn, A., Abdennur,  
438 N., Dekker, J., Mirny, L.A., Bruneau, B.G., 2017. Targeted Degradation of CTCF  
439 Decouples Local Insulation of Chromosome Domains from Genomic  
440 Compartmentalization. *Cell* 169, 930–944.e22. doi:10.1016/j.cell.2017.05.004
- 441 Nora, E.P., Lajoie, B.R., Schulz, E.G., Giorgetti, L., Okamoto, I., Servant, N., Piolot,  
442 T., van Berkum, N.L., Meisig, J., Sedat, J., Gribnau, J., Barillot, E., Blüthgen, N.,  
443 Dekker, J., Heard, E., 2012. Spatial partitioning of the regulatory landscape of  
444 the X-inactivation centre. *Nature* 485, 381–385. doi:10.1038/nature11049
- 445 Plys, A.J., Davis, C.P., Kim, J., Rizki, G., Keenen, M.M., Marr, S.K., Kingston, R.E.,  
446 2018. Phase separation and nucleosome compaction are governed by the same  
447 domain of Polycomb Repressive Complex 1. *bioRxiv* 467316.  
448 doi:<https://doi.org/10.1101/467316>
- 449 Rao, S.S.P., Huang, S.-C., Glenn St Hilaire, B., Engreitz, J.M., Perez, E.M., Kieffer-  
450 Kwon, K.-R., Sanborn, A.L., Johnstone, S.E., Bascom, G.D., Bochkov, I.D.,  
451 Huang, X., Shamim, M.S., Shin, J., Turner, D., Ye, Z., Omer, A.D., Robinson,  
452 J.T., Schlick, T., Bernstein, B.E., Casellas, R., Lander, E.S., Aiden, E.L., 2017.  
453 Cohesin Loss Eliminates All Loop Domains. *Cell* 171, 305–320.e24.  
454 doi:10.1016/j.cell.2017.09.026
- 455 Rao, S.S.P., Huntley, M.H., Durand, N.C., Stamenova, E.K., Bochkov, I.D.,  
456 Robinson, J.T., Sanborn, A.L., Machol, I., Omer, A.D., Lander, E.S., Aiden, E.L.,  
457 2014. A 3D map of the human genome at kilobase resolution reveals principles  
458 of chromatin looping. *Cell* 159, 1665–1680. doi:10.1016/j.cell.2014.11.021
- 459 Rowley, M.J., Corces, V.G., 2018. Organizational principles of 3D genome  
460 architecture. *Nat Rev Genet* 19, 789–800. doi:10.1038/s41576-018-0060-8
- 461 Sabari, B.R., Dall'Agnesse, A., Boija, A., Klein, I.A., Coffey, E.L., Shrinivas, K.,  
462 Abraham, B.J., Hannett, N.M., Zamudio, A.V., Manteiga, J.C., Li, C.H., Guo,  
463 Y.E., Day, D.S., Schuijers, J., Vasile, E., Malik, S., Hnisz, D., Lee, T.I., Cisse, I.I.,  
464 Roeder, R.G., Sharp, P.A., Chakraborty, A.K., Young, R.A., 2018. Coactivator  
465 condensation at super-enhancers links phase separation and gene control.  
466 *Science* 361, eaar3958. doi:10.1126/science.aar3958
- 467 Sanborn, A.L., Rao, S.S.P., Huang, S.-C., Durand, N.C., Huntley, M.H., Jewett, A.I.,  
468 Bochkov, I.D., Chinnappan, D., Cutkosky, A., Li, J., Geeting, K.P., Gnirke, A.,  
469 Melnikov, A., McKenna, D., Stamenova, E.K., Lander, E.S., Aiden, E.L., 2015.  
470 Chromatin extrusion explains key features of loop and domain formation in wild-  
471 type and engineered genomes. *Proc. Natl. Acad. Sci. U.S.A.* 112, E6456–65.  
472 doi:10.1073/pnas.1518552112
- 473 Schoenfelder, S., Sugar, R., Dimond, A., Javierre, B.-M., Armstrong, H., Mifsud, B.,  
474 Dimitrova, E., Matheson, L., Tavares-Cadete, F., Furlan-Magaril, M., Segonds-  
475 Pichon, A., Jurkowski, W., Wingett, S.W., Tabbada, K., Andrews, S., Herman, B.,  
476 LeProust, E., Osborne, C.S., Koseki, H., Fraser, P., Luscombe, N.M., Elderkin,  
477 S., 2015. Polycomb repressive complex PRC1 spatially constrains the mouse  
478 embryonic stem cell genome. *Nat. Genet.* 47, 1179–1186. doi:10.1038/ng.3393
- 479 Schuettengruber, B., Bourbon, H.-M., Di Croce, L., Cavalli, G., 2017. Genome  
480 Regulation by Polycomb and Trithorax: 70 Years and Counting. *Cell* 171, 34–57.  
481 doi:10.1016/j.cell.2017.08.002
- 482 Schwarzer, W., Abdennur, N., Goloborodko, A., Pekowska, A., Fudenberg, G., Loe-  
483 Mie, Y., Fonseca, N.A., Huber, W., Haering, C.H., Mirny, L., Spitz, F., 2017. Two  
484 independent modes of chromatin organization revealed by cohesin removal.  
485 *Nature* 551, nature24281. doi:10.1038/nature24281

486 Tatavosian, R., Kent, S., Brown, K., Yao, T., Duc, H.N., Huynh, T.N., Zhen, C.Y., Ma,  
487 B., Wang, H., Ren, X., 2019. Nuclear condensates of the Polycomb protein  
488 chromobox 2 (CBX2) assemble through phase separation. *J. Biol. Chem.* 294,  
489 1451–1463. doi:10.1074/jbc.RA118.006620  
490 Wang, X., Brandão, H.B., Le, T.B.K., Laub, M.T., Rudner, D.Z., 2017. *Bacillus subtilis*  
491 SMC complexes juxtapose chromosome arms as they travel from origin to  
492 terminus. *Science* 355, 524–527. doi:10.1126/science.aai8982  
493 Wutz, G., Varnai, C., Nagasaka, K., Cisneros, D.A., Stocsits, R.R., Tang, W.,  
494 Schoenfelder, S., Jessberger, G., Muhar, M., Hossain, M.J., Walther, N., Koch,  
495 B., Kueblbeck, M., Ellenberg, J., Zuber, J., Fraser, P., Peters, J.-M., 2017.  
496 Topologically associating domains and chromatin loops depend on cohesin and  
497 are regulated by CTCF, WAPL, and PDS5 proteins. *EMBO J.* e201798004.  
498 doi:10.15252/embj.201798004  
499

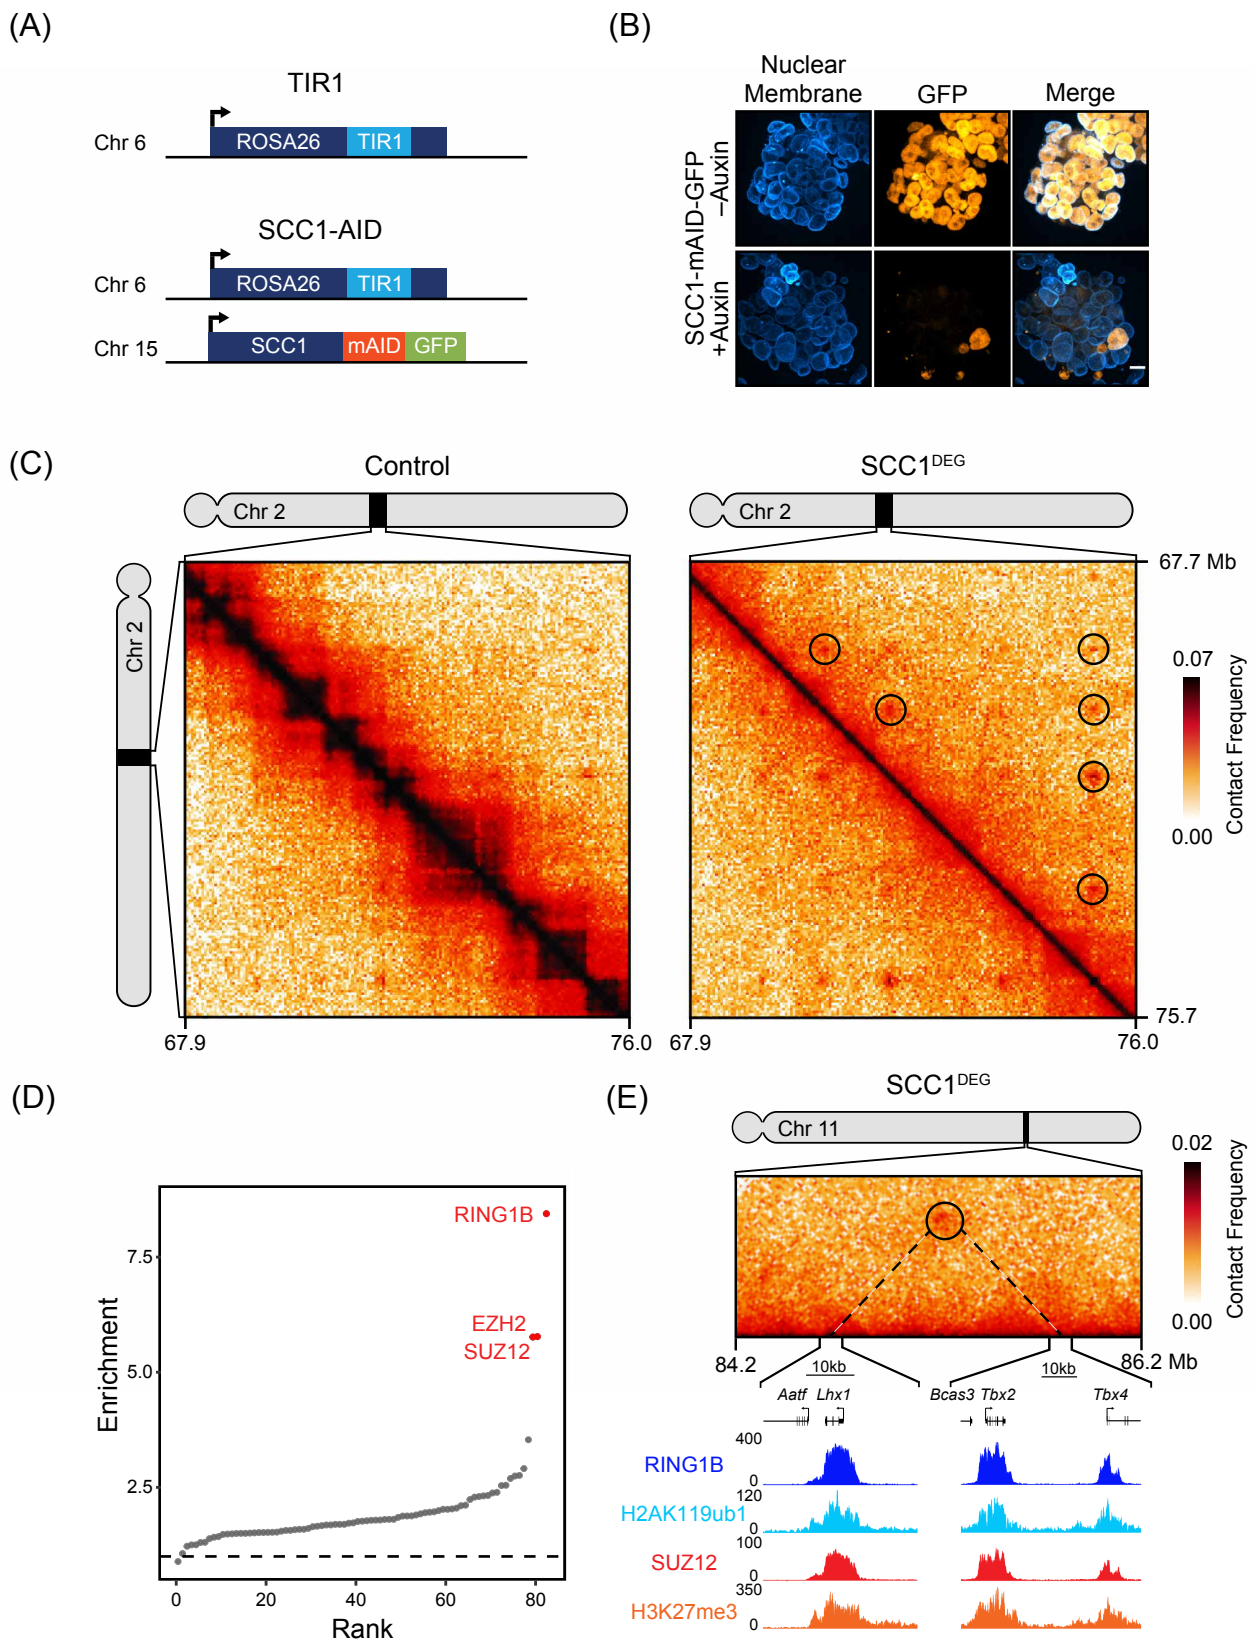

Figure 1

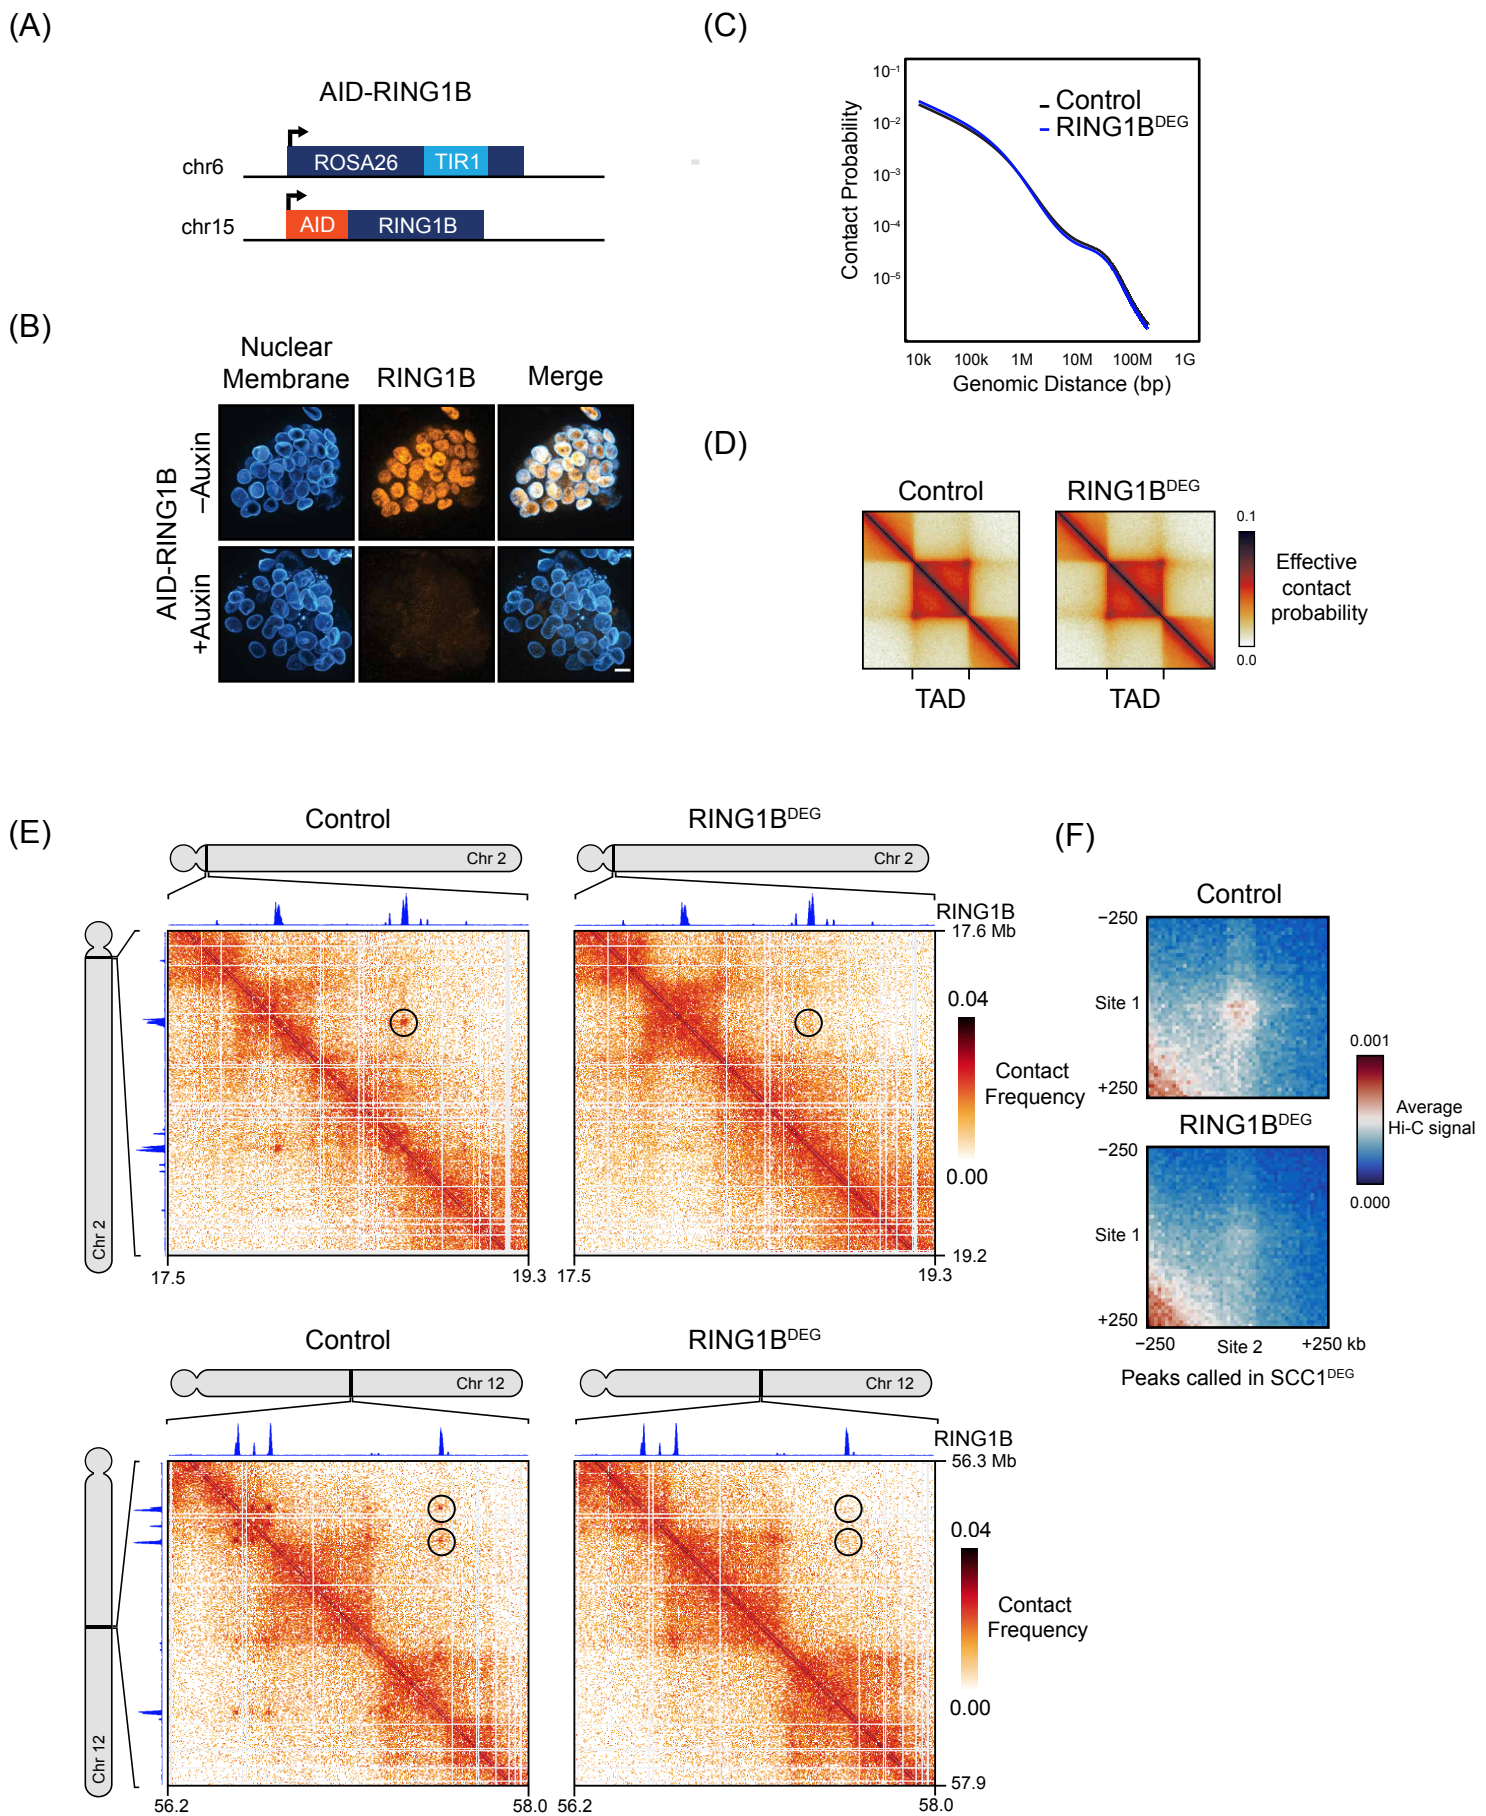

Figure 2

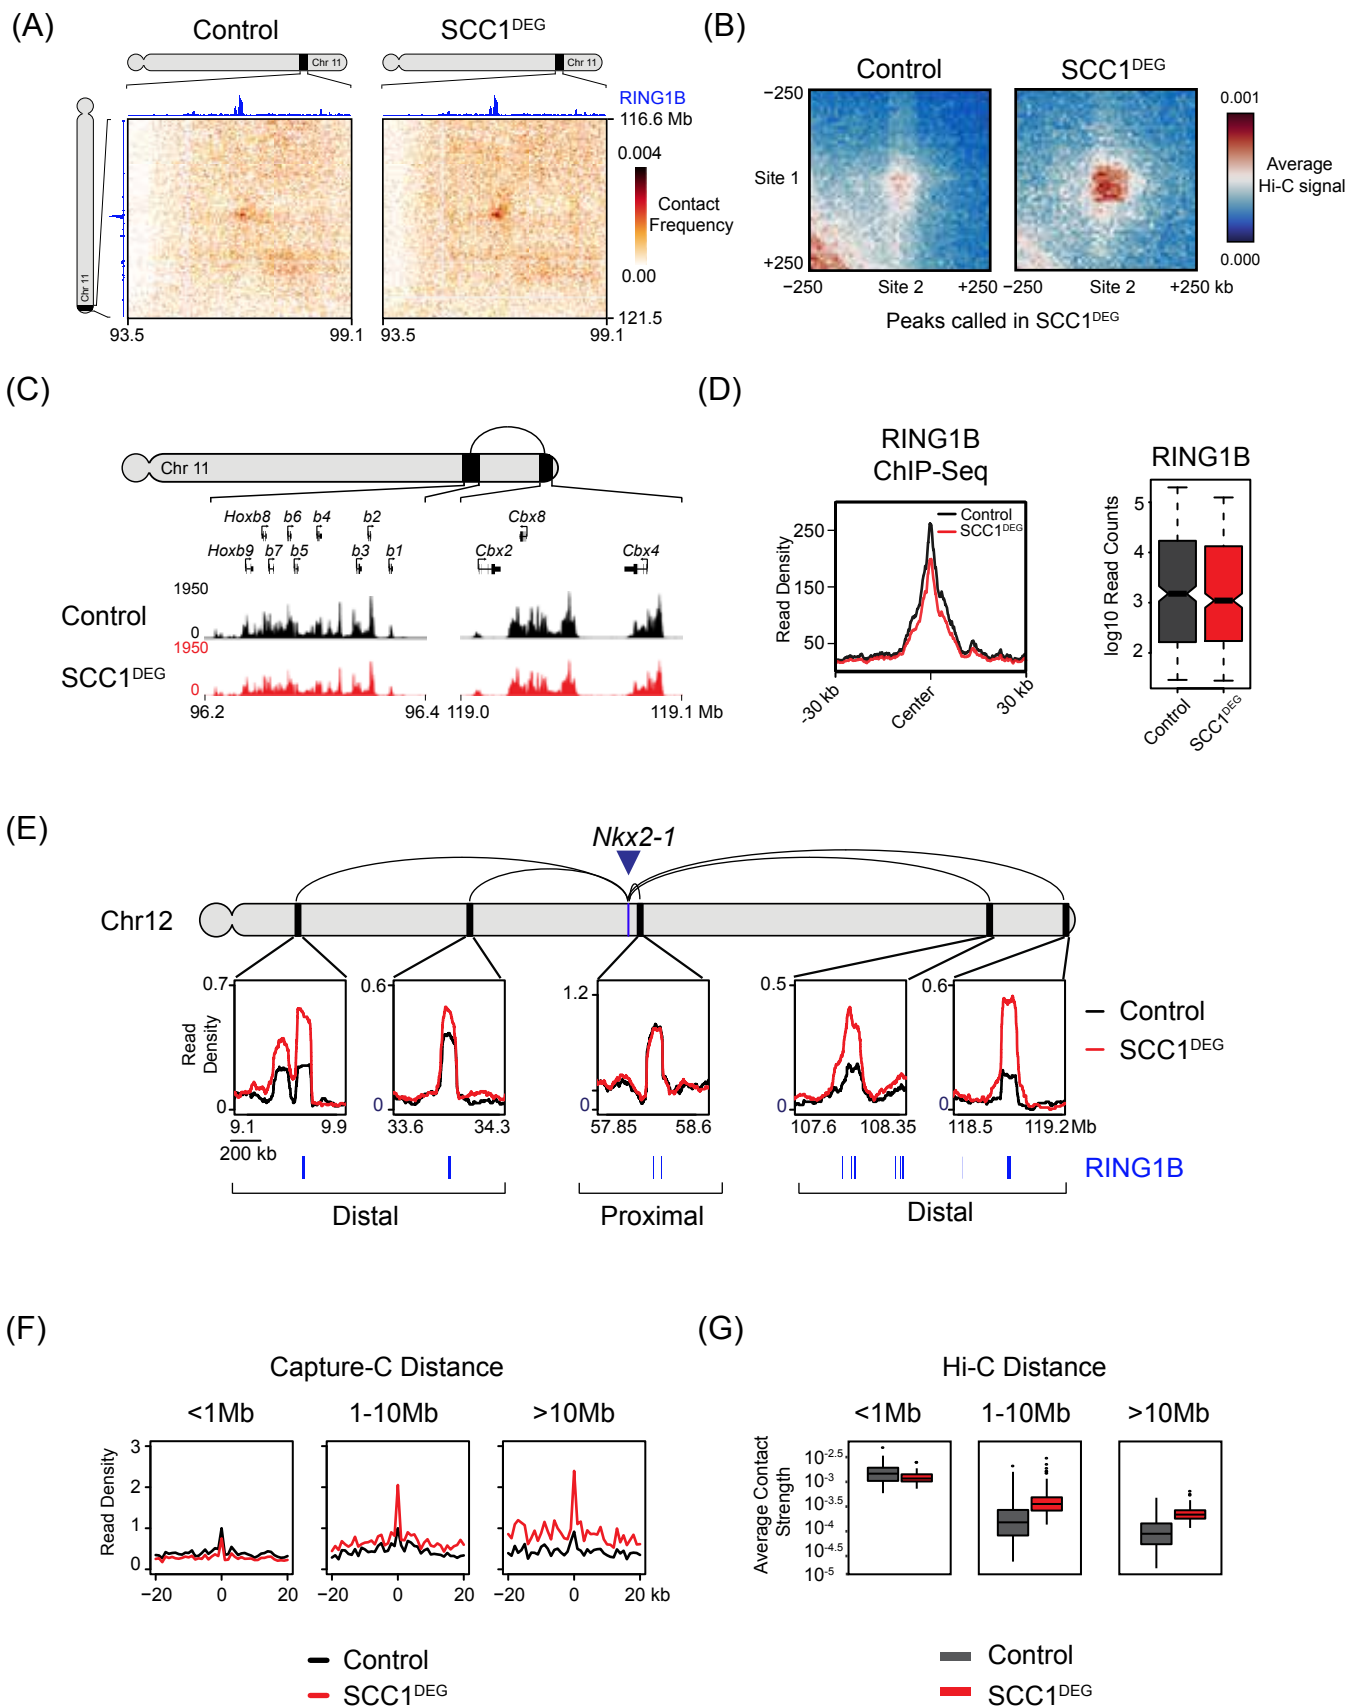

Figure 3



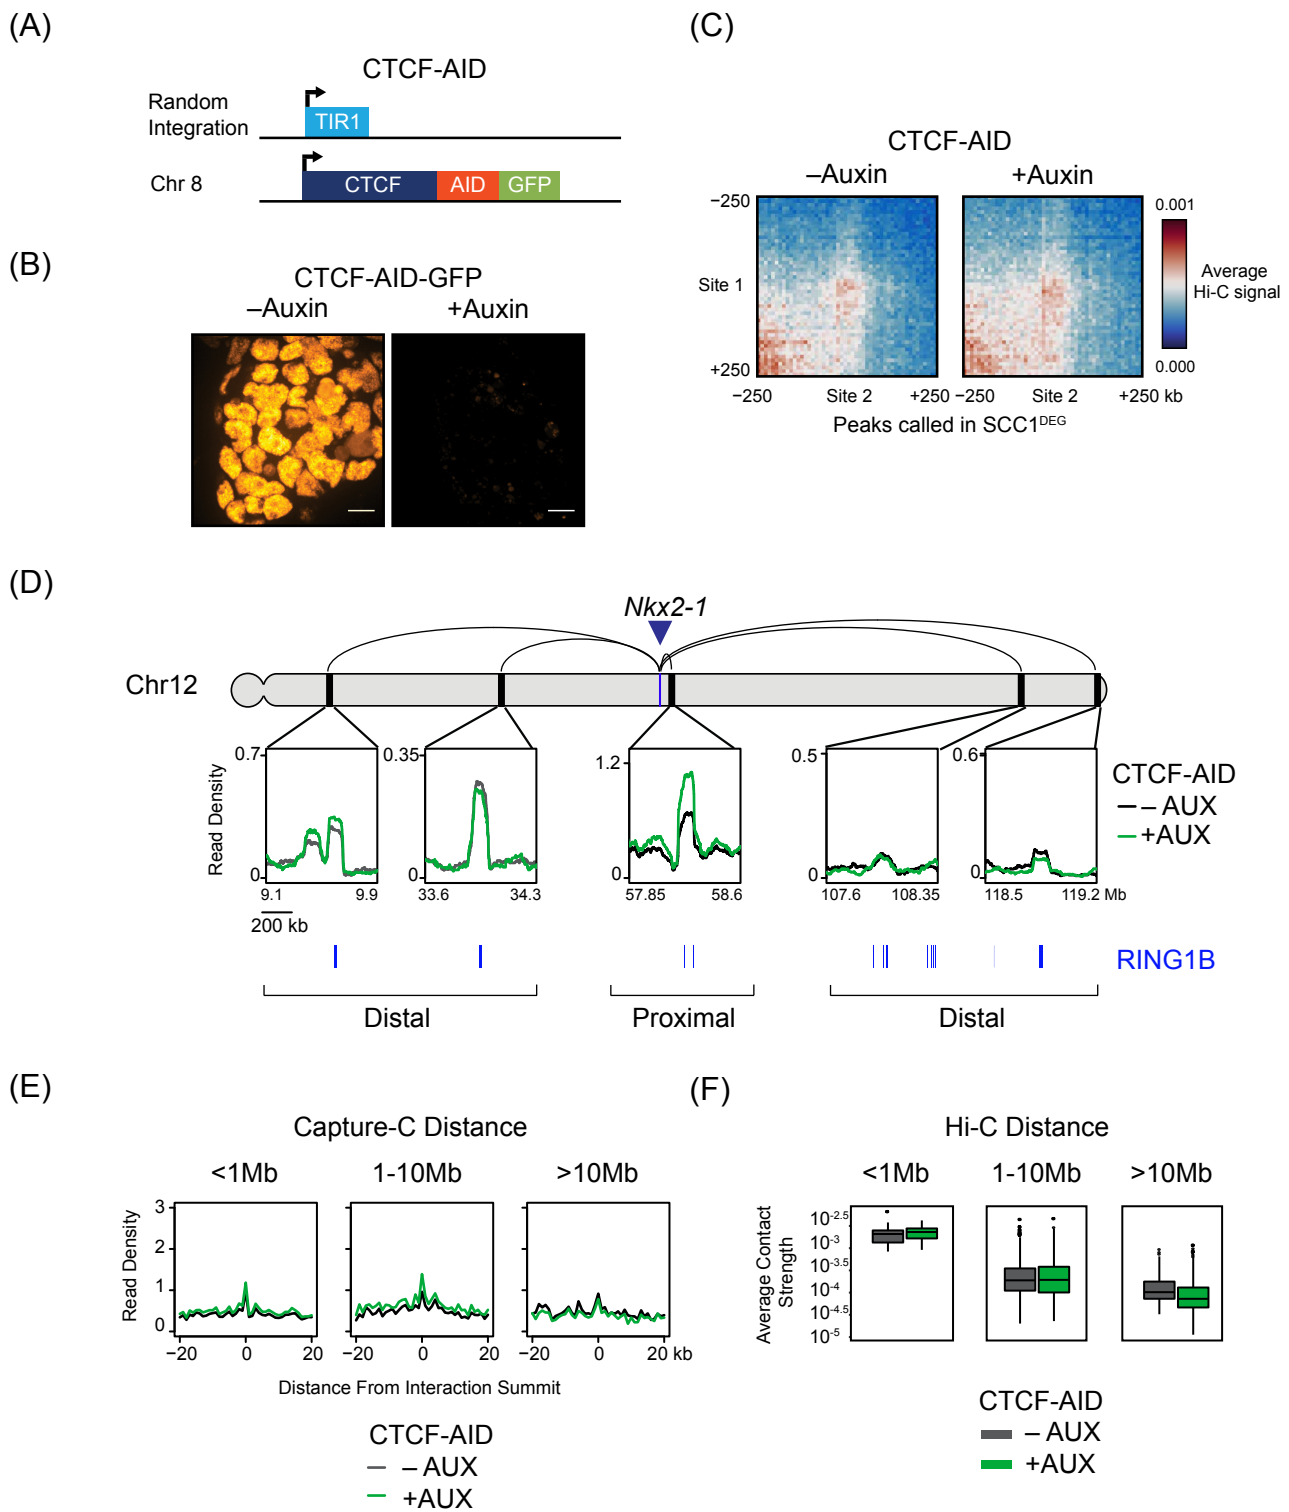

Figure 4

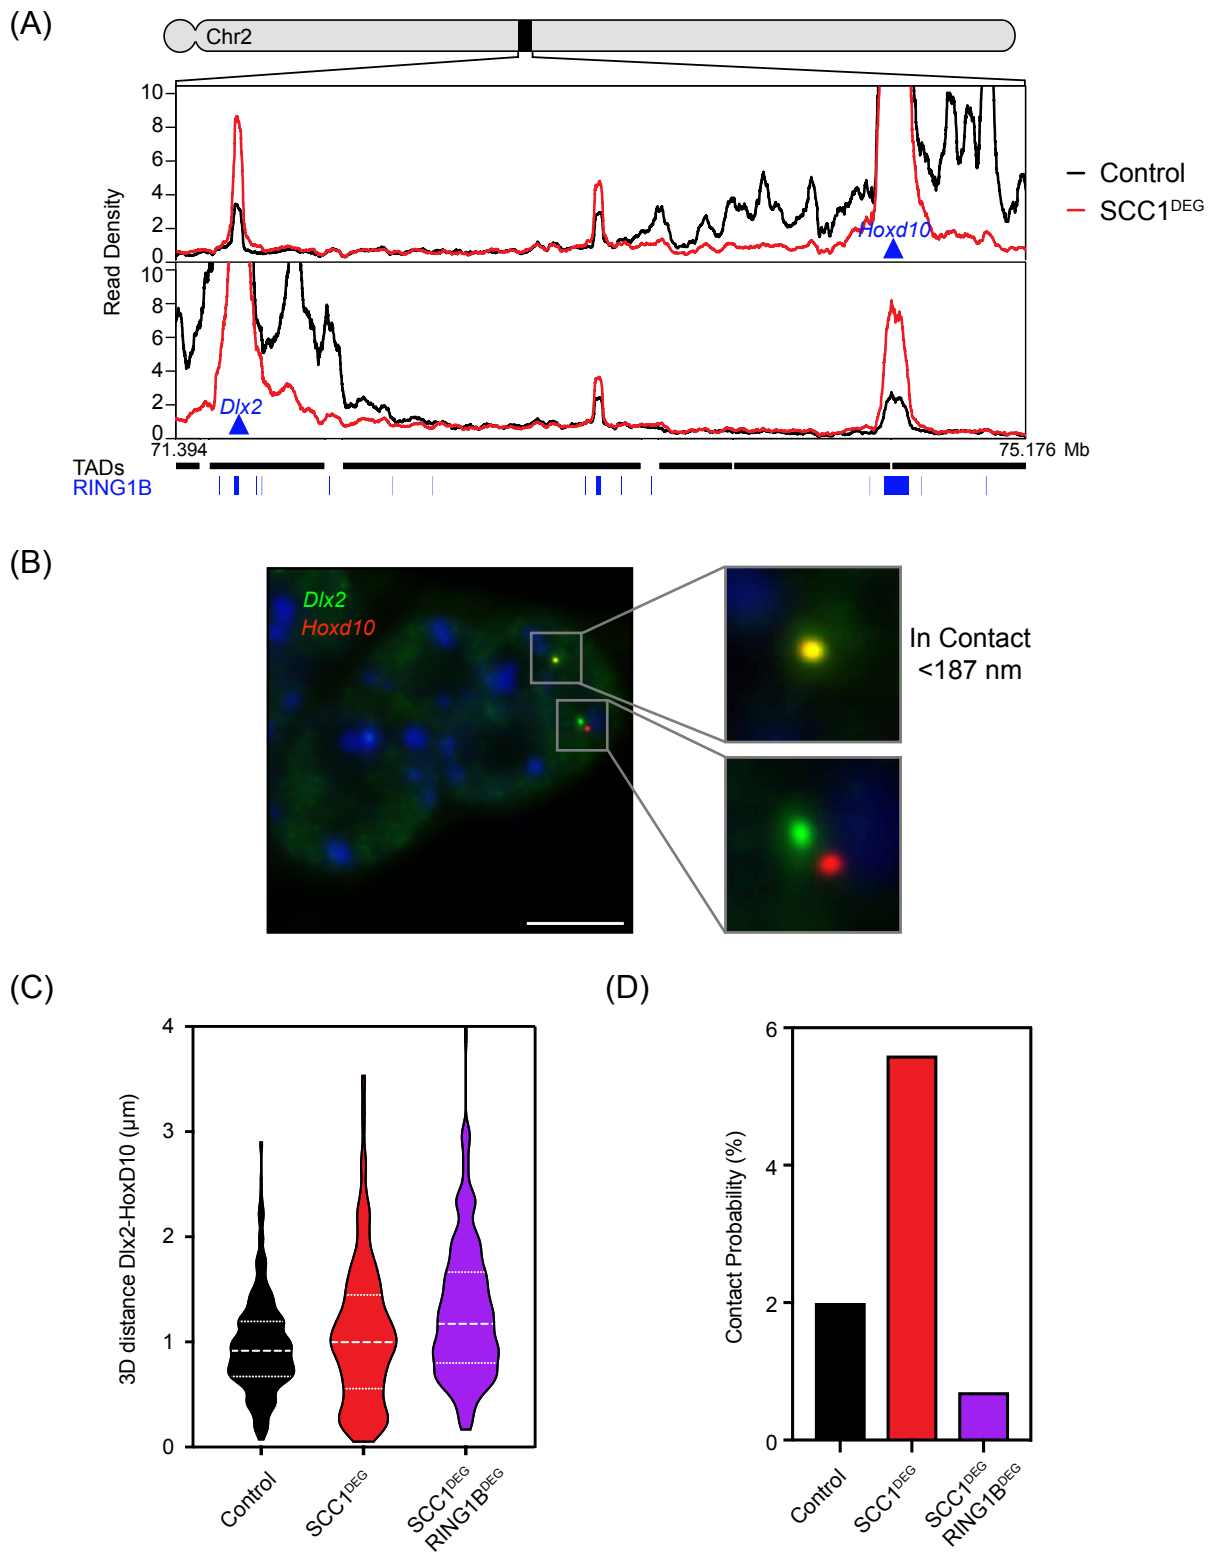

Figure 5

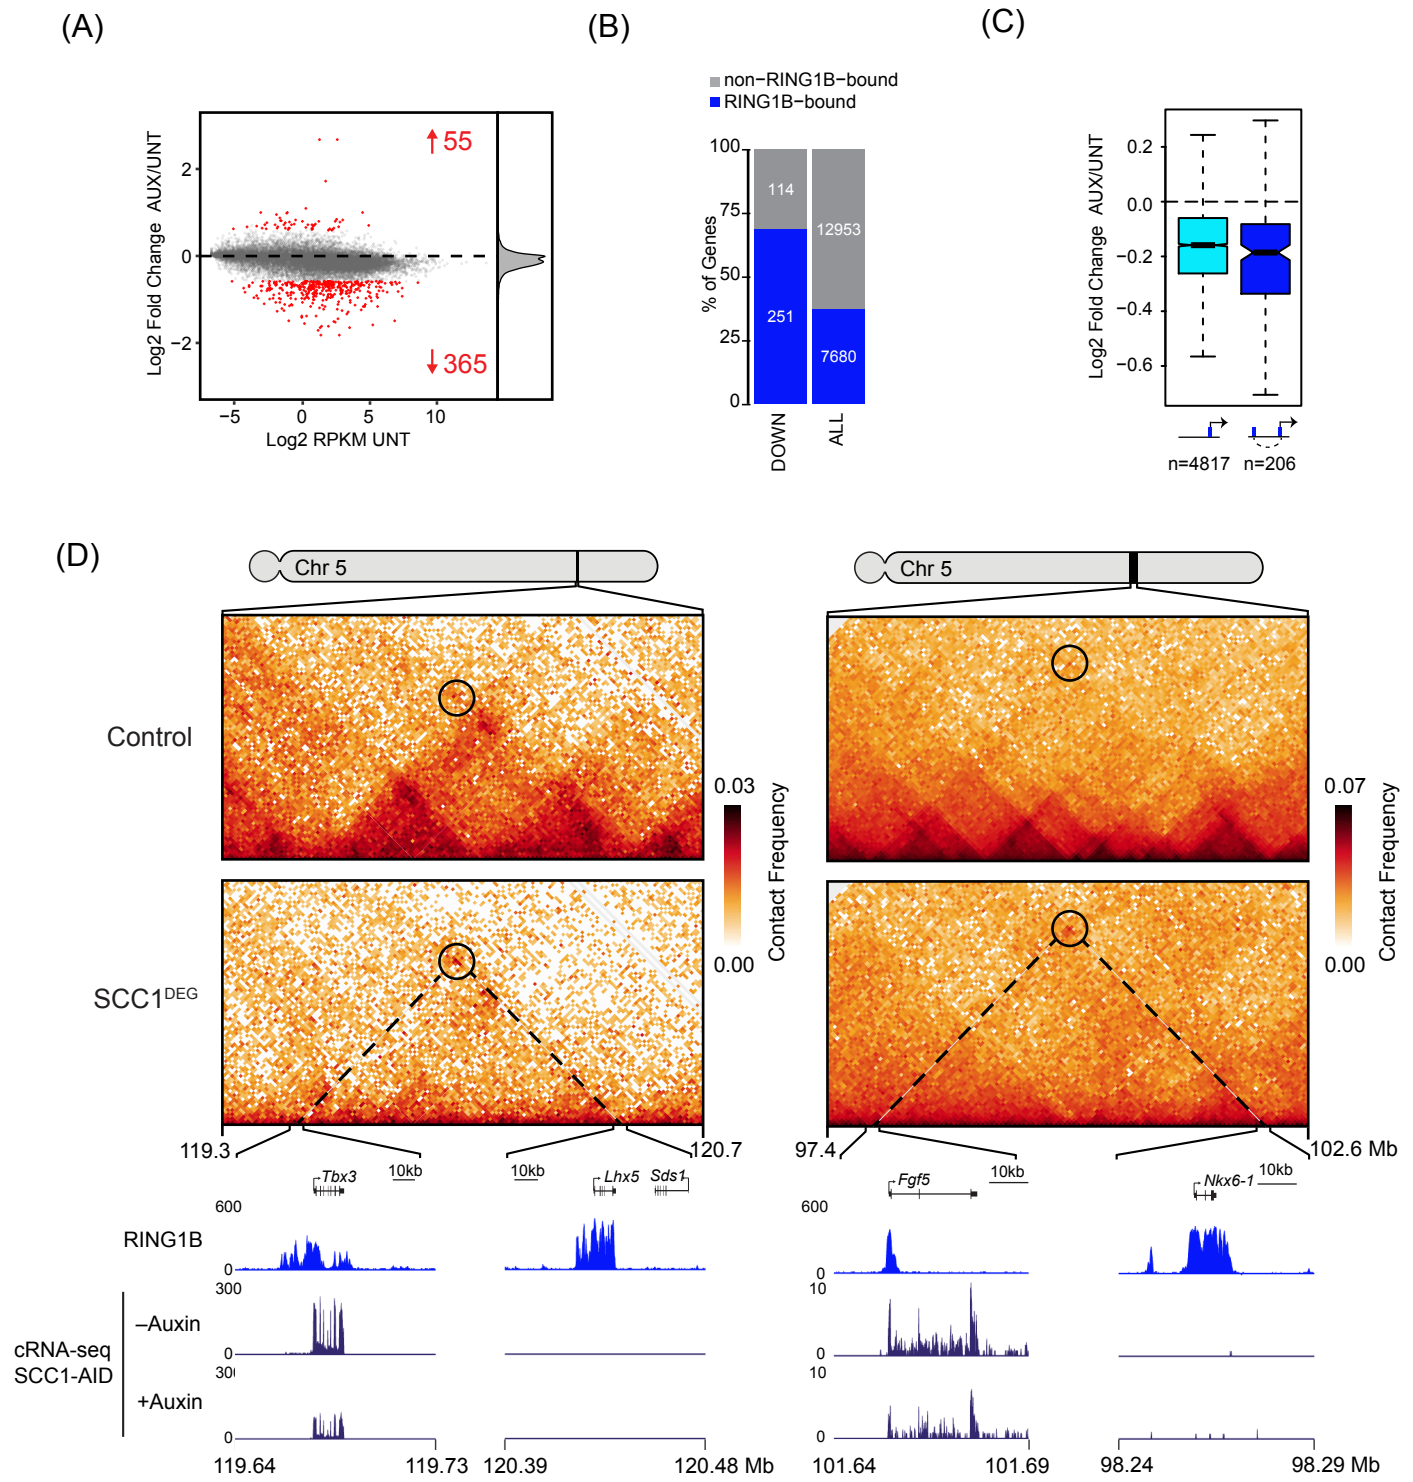

Figure 6

Wild type

No Cohesin

No PRC1

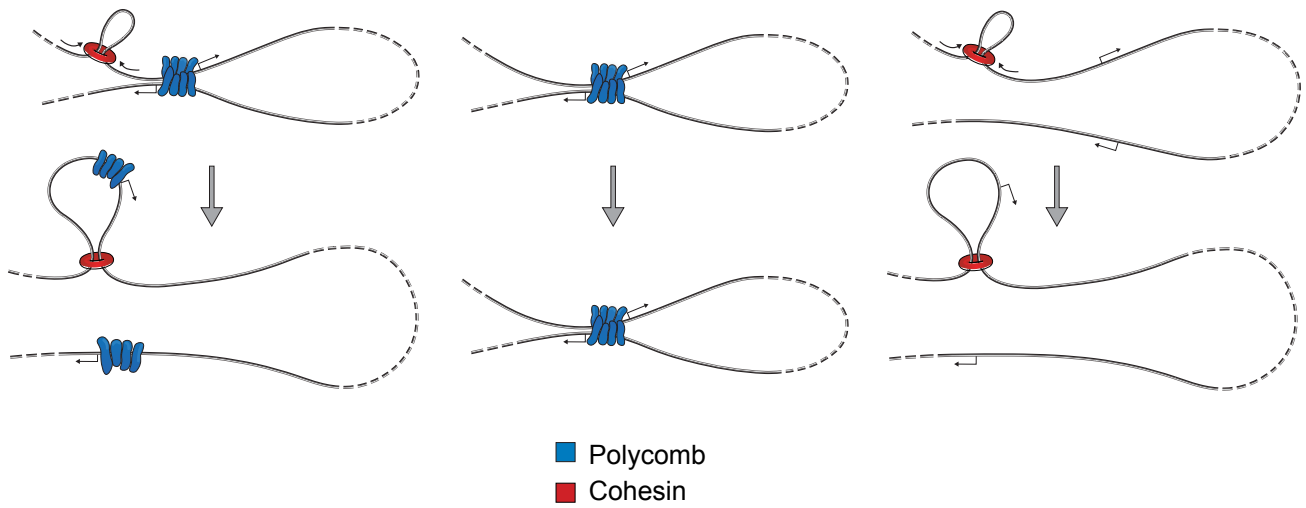

Figure 7

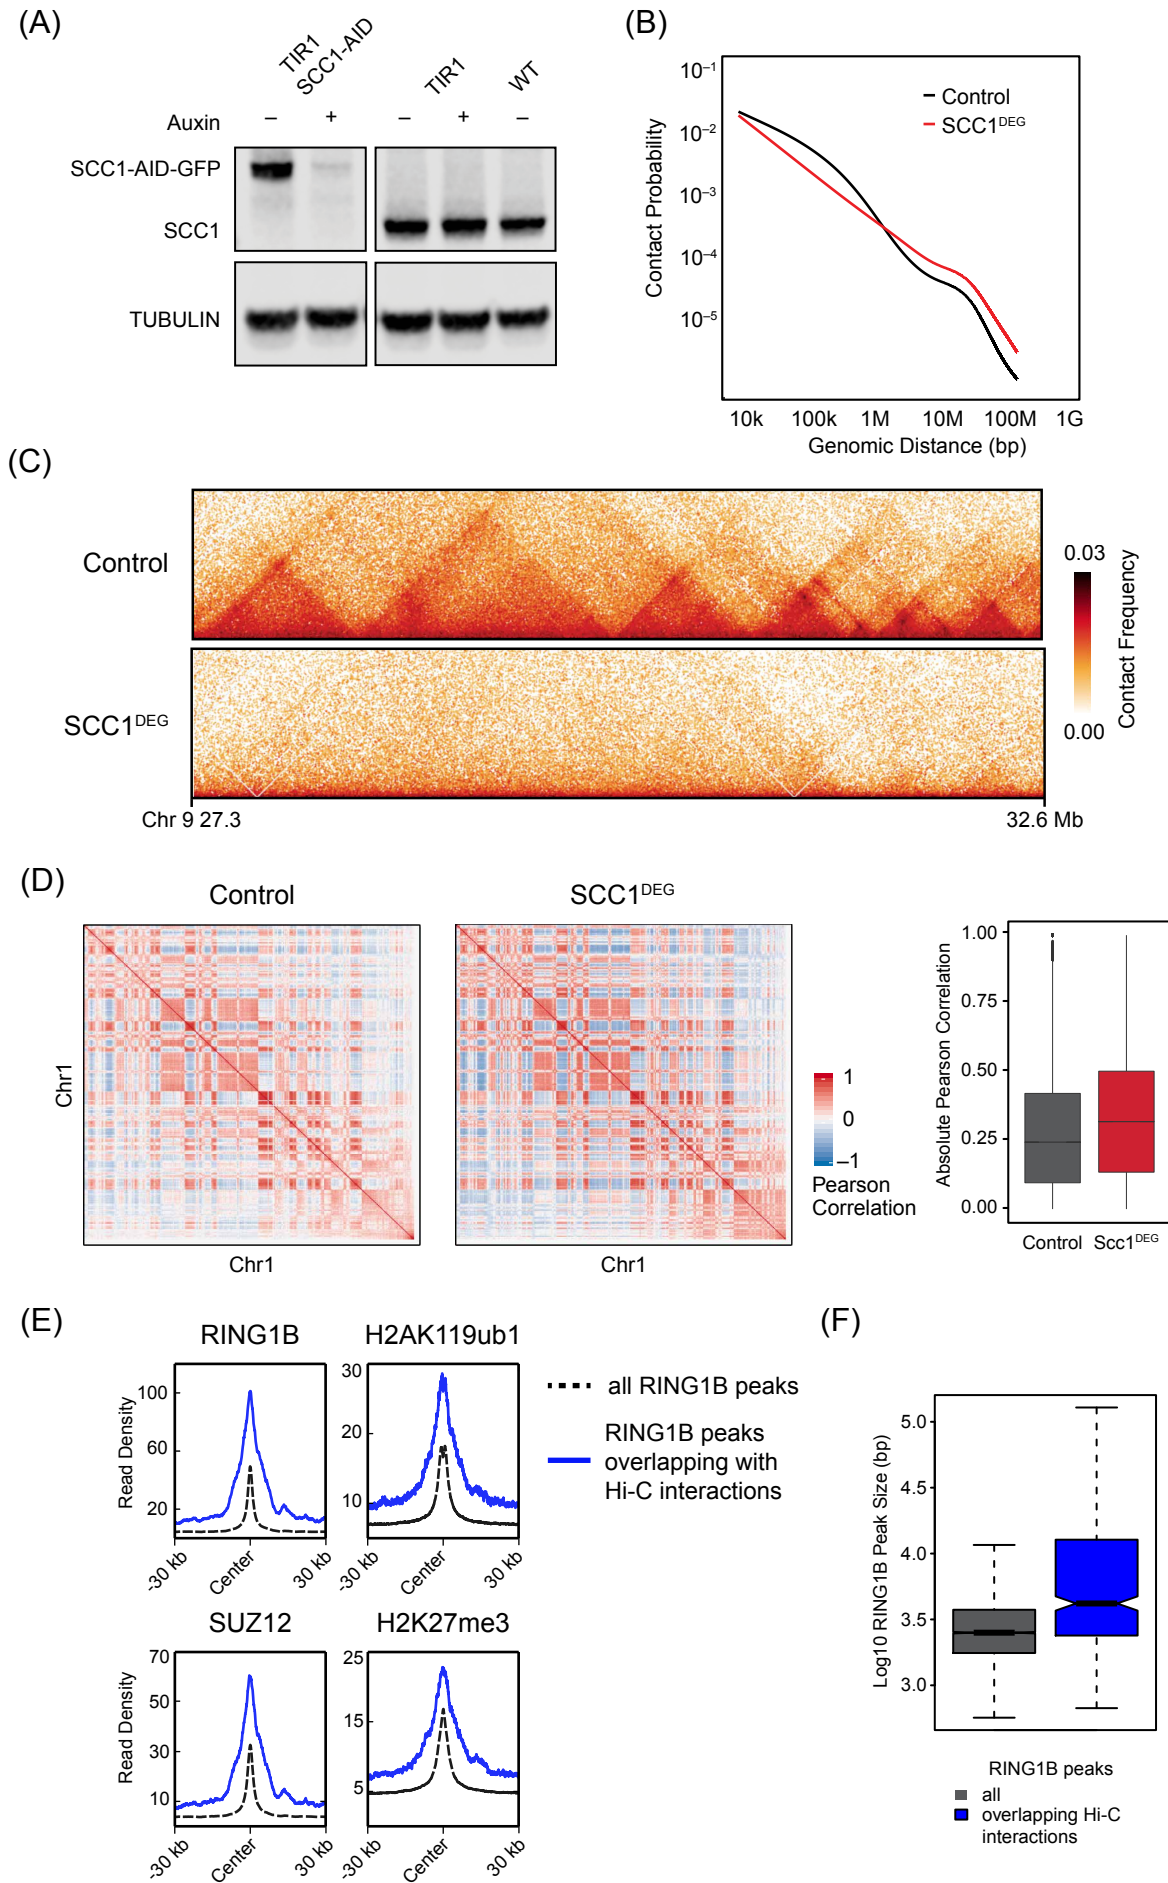

Figure S1

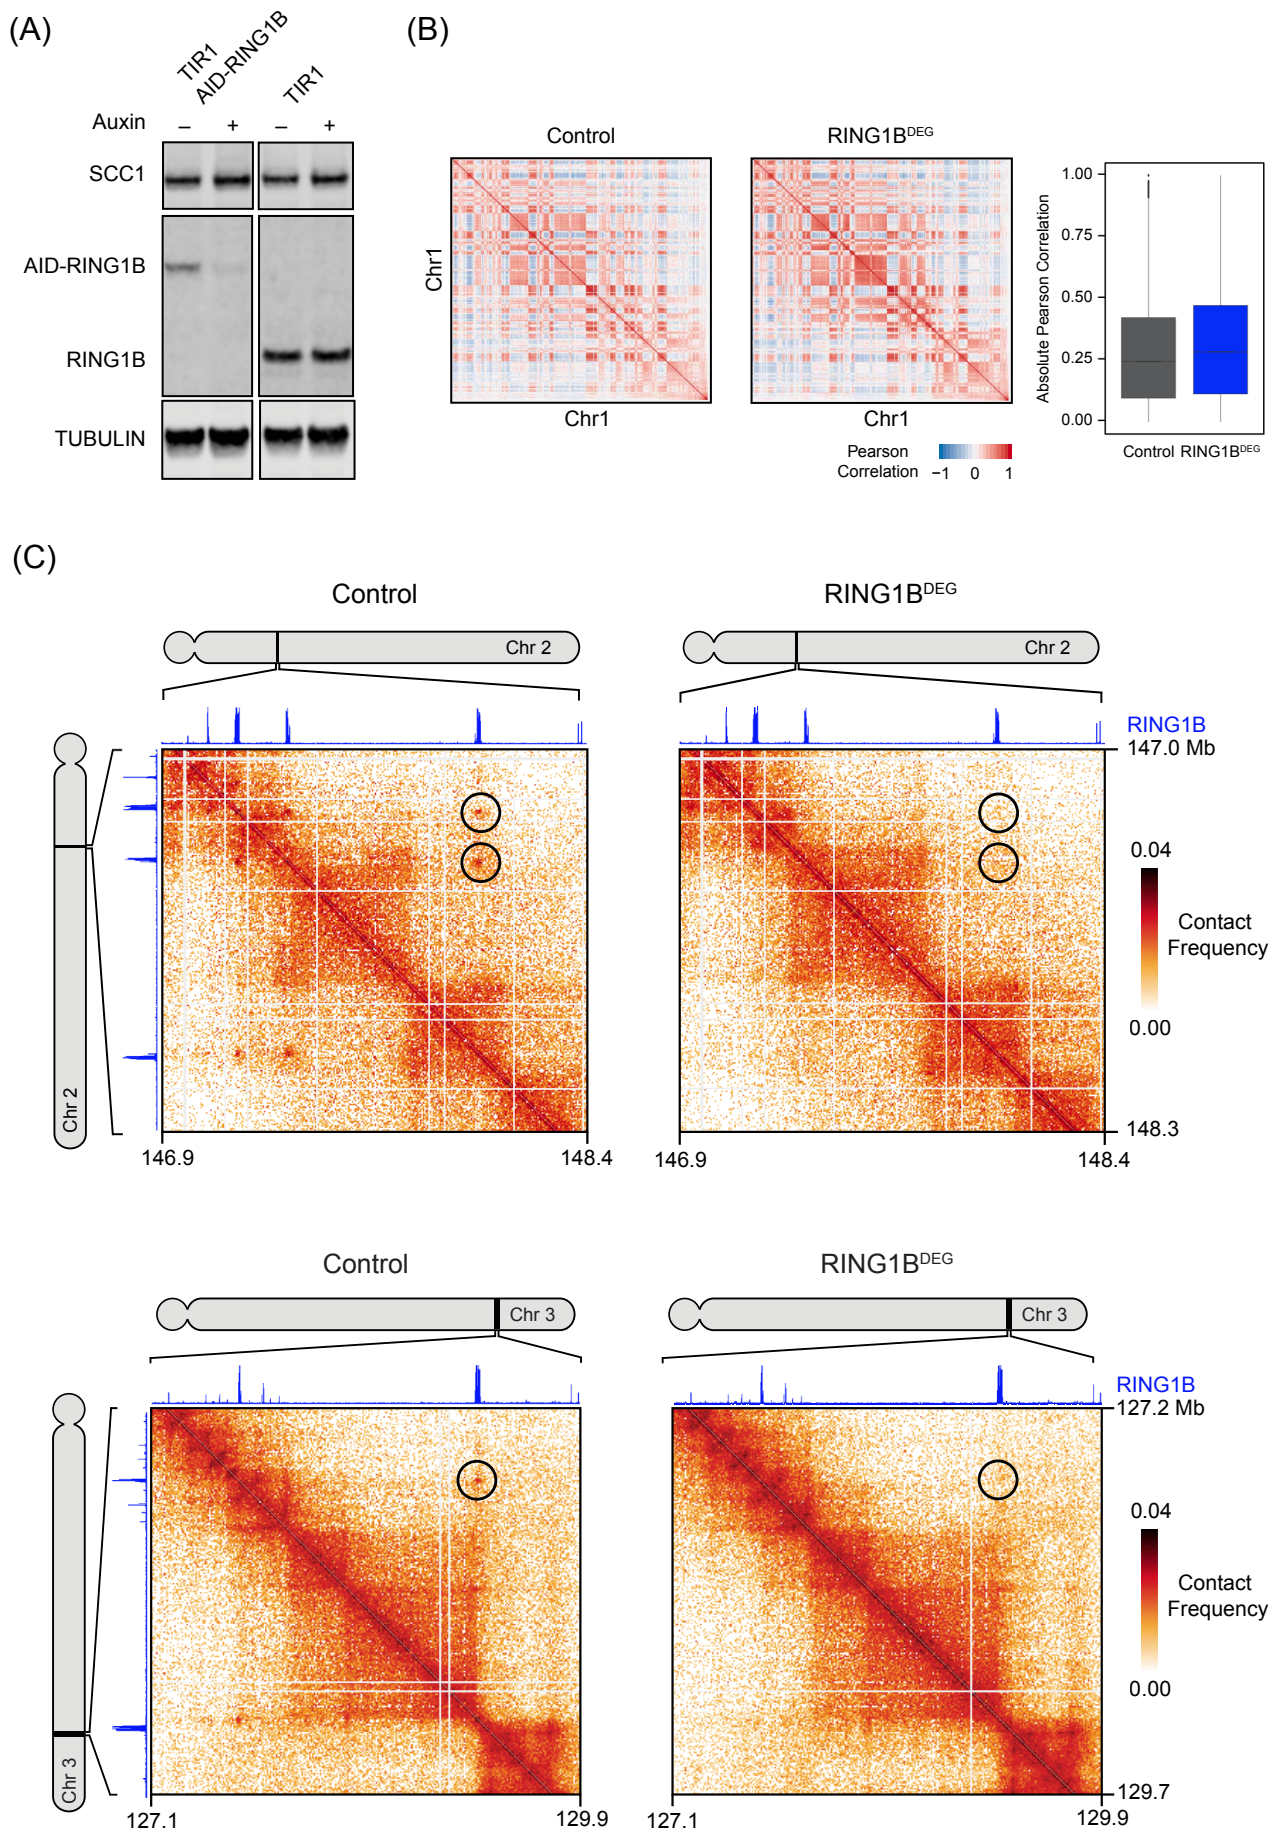

Figure S2

(A)

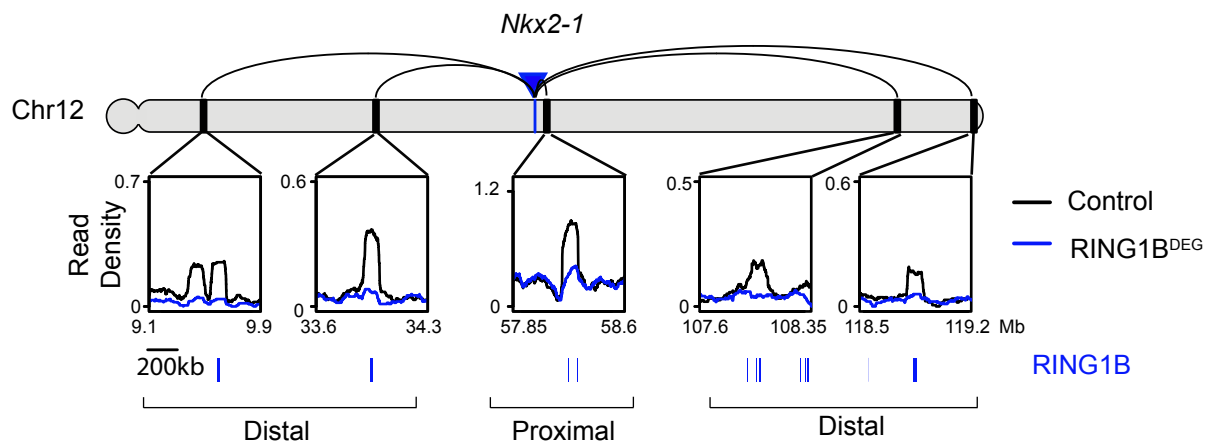

(B)

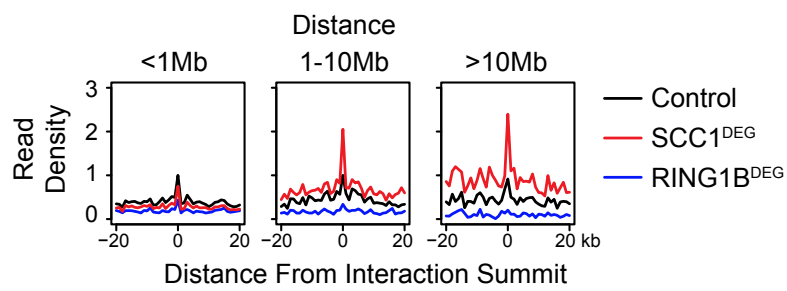

Figure S3

(A)

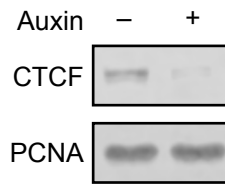

(B)

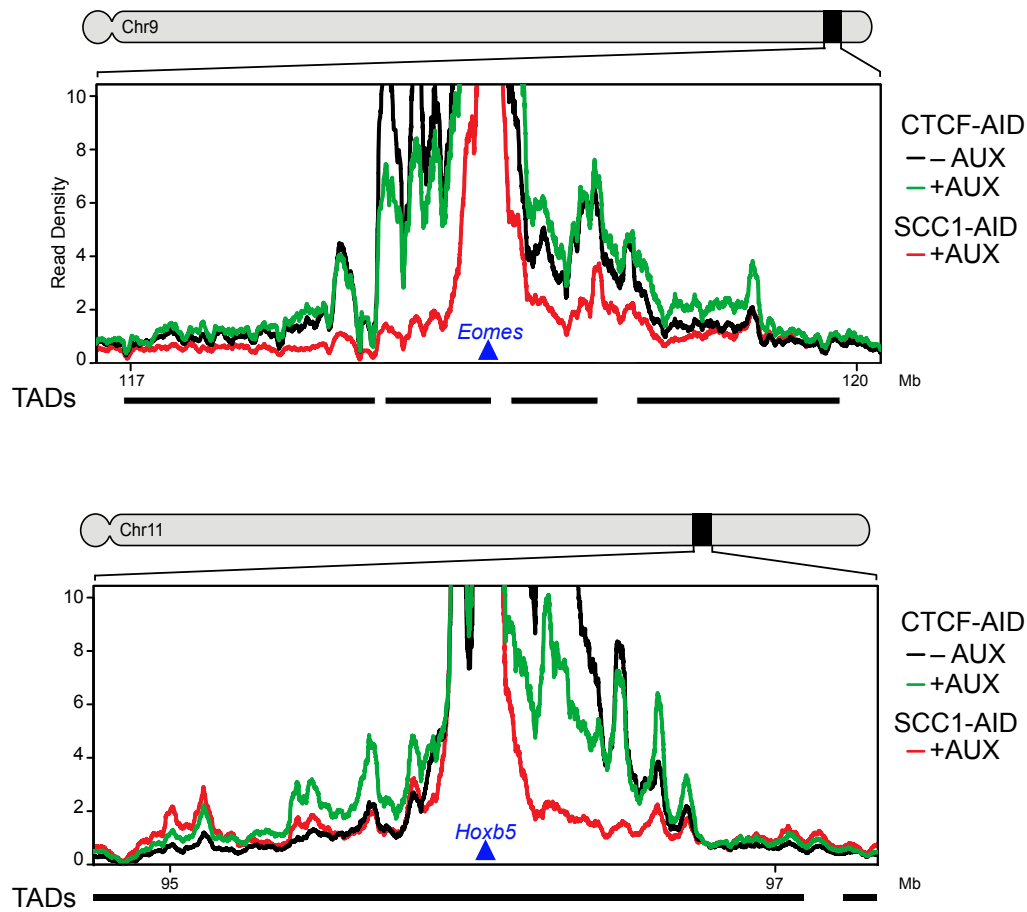

Figure S4



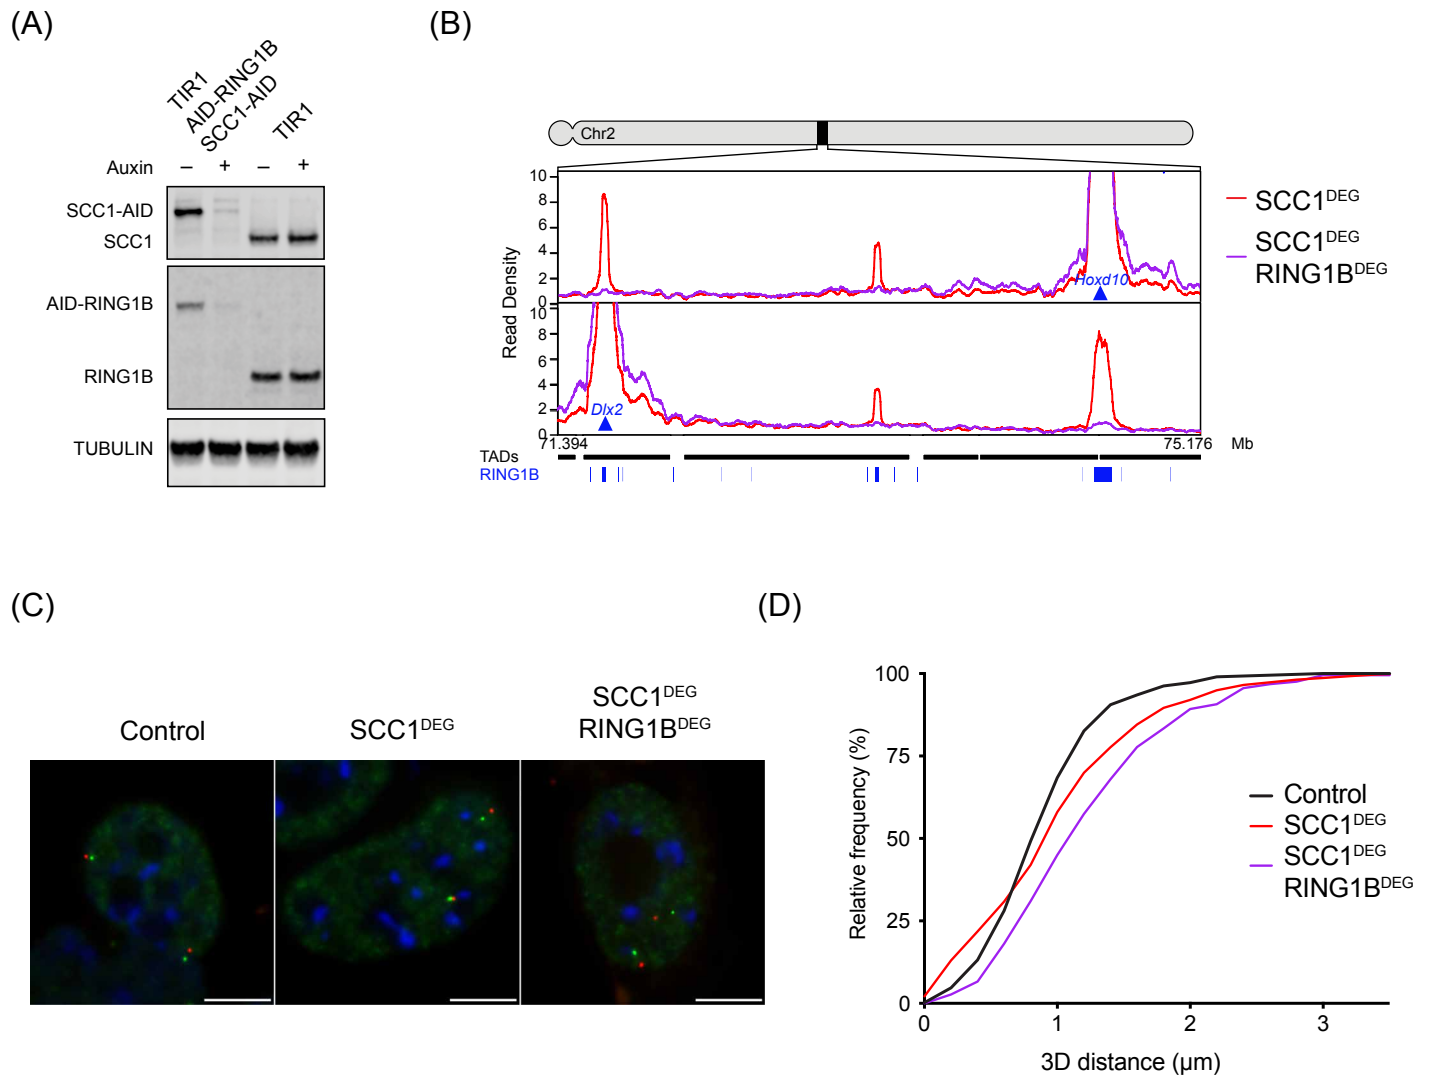

Figure S5

(A)

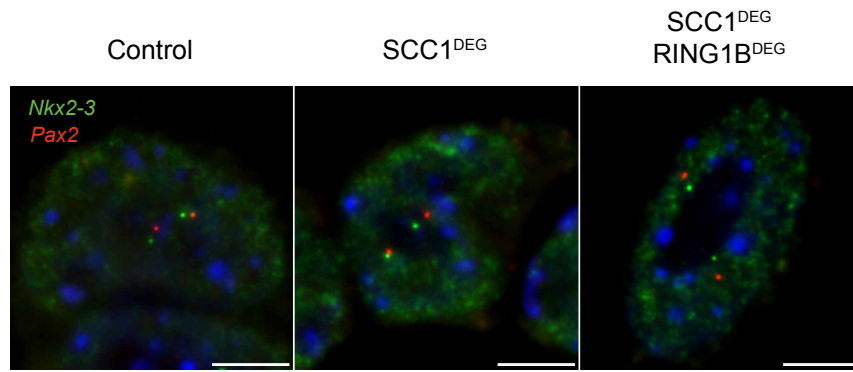

(B)

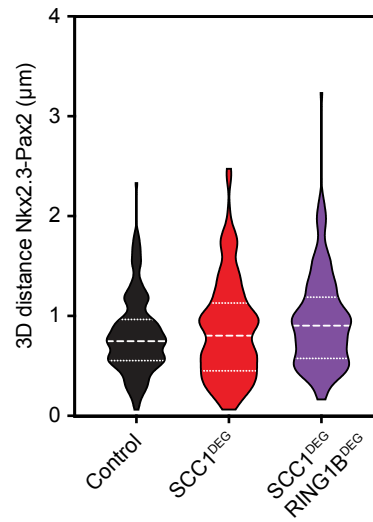

(C)

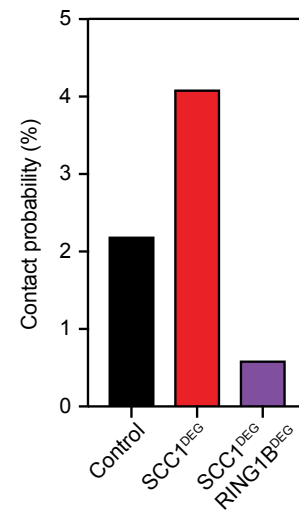

(D)

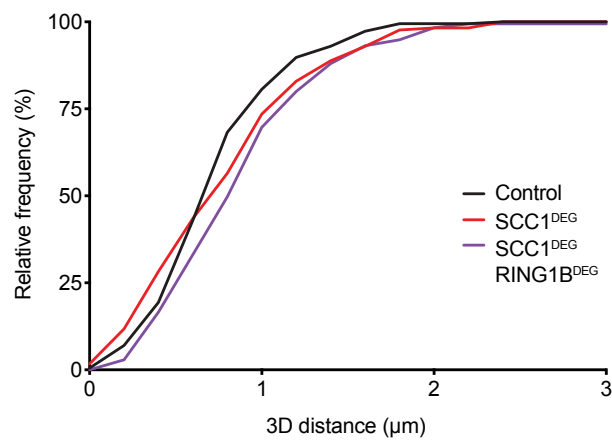

(A)

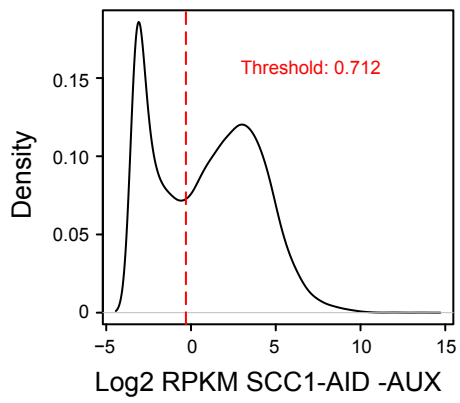

(B)

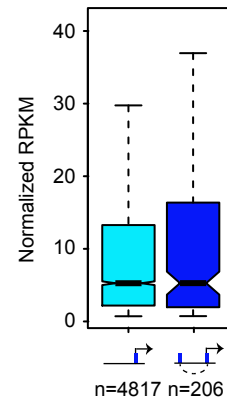

## Figure Legends

### Figure 1 – Cohesin-independent chromosomal interactions correspond to polycomb chromatin domains in ESCs

(A) A schematic illustrating the genotype of the TIR1 and SCC1-mAID-GFP cell lines developed for Hi-C.

(B) Immunofluorescence microscopy images of SCC1-mAID-GFP ESCs  $\pm$  auxin (6 h). The nuclear membrane was labelled with an antibody against Lamin B1. Scale bar = 10  $\mu$ m (bottom).

(C) Hi-C in Control (TIR1 line + auxin) (left) and SCC1<sup>DEG</sup> (SCC1-mAID-GFP line + auxin) (right) cells after auxin treatment visualised at 40 kb resolution. Peaks identified on the SCC1<sup>DEG</sup> Hi-C matrix are shown as black circles. The genomic coordinates are illustrated below and to the right of the matrices.

(D) Enrichment of histone modifications and proteins at paired interaction sites compared to the enrichments at matched random interaction sites.

(E) ChIP-Seq snapshot illustrating RING1B, H2AK119ub, SUZ12 and H3K27me3 under an interaction that persists in the absence of cohesin. The Hi-C matrix is shown above at 20 kb resolution.

### Figure 2 – Polycomb mediates interactions that persist in the absence of cohesin

(A) A schematic illustrating the genotype of the AID-RING1B cell line.

(B) Immunofluorescence microscopy images of AID-RING1B ESCs  $\pm$  auxin (6 h incubation) (bottom). The cells were labelled with antibodies against Lamin B1 and RING1B. Scale bar = 10  $\mu$ m (bottom).

(C) Genomic distance-dependent contact probability from Hi-C in Control or RING1B<sup>DEG</sup> (AID-RING1B + auxin) cells.

(D) Aggregate TAD analysis of Control and RING1B<sup>DEG</sup> cells at 10 kb resolution. Effective contact probability is displayed at a published set of TAD intervals from ESC Hi-C (Bonev et al., 2017).

(E) Hi-C in Control and RING1B<sup>DEG</sup> cells at interactions that persist in the absence of cohesin (black circles) at 5 kb resolution. RING1B ChIP-seq is displayed above and to the left of the matrices.

(F) Aggregate analysis of Hi-C from Control and RING1B<sup>DEG</sup> cells at interactions that persist in the absence of cohesin (n=336).

### Figure 3 – Cohesin removal strengthens long-range polycomb chromatin domain interactions

(A) Hi-C illustrating an interaction that increases in strength in the SCC1<sup>DEG</sup> cell line visualised at 20 kb resolution. RING1B ChIP-seq is displayed above and to the left of the matrices.

(B) Aggregate analysis of Hi-C from Control and SCC1<sup>DEG</sup> cells at peaks that persist in the absence of cohesin (n=336).

(C) ChIP-Seq for RING1B in the Control and SCC1<sup>DEG</sup> cells at the interacting sites shown in (A).

(D) RING1B ChIP-seq signal (metaplots (left) and boxplots (right)) at RING1B peaks overlapping interactions that persist in the absence of cohesin.

(E) Capture-C interaction profiles between the *Nkx2-1* promoter and selected proximal and distal RING1B-occupied sites in the Control and SCC1<sup>DEG</sup> cells.

RING1B ChIP-seq peaks are shown as blue bars below. The location of the *Nkx2-1*

promoter is indicated with a blue arrow/bar and the interactions sites as black bars on the chromosome. Read density corresponds to normalized reads in the capture averaged across 250 DpnII restriction fragments.

(F) Aggregate Capture-C signal in the Control and SCC1<sup>DEG</sup> cells at interaction sites segregated based on distance from the capture site. Only interactions between polycomb target gene promoters and RING1B occupied sites present in SCC1<sup>DEG</sup> are shown. Read density was normalised to Control signal at the summit and the x-axis illustrates the distance from the interaction site in DpnII fragments.

(G) Average Hi-C contact strength in the Control and SCC1<sup>DEG</sup> at interactions that persist in the absence of cohesin segregated based on distance between the interactions.

#### **Figure 4 – Cohesin counteracts polycomb chromatin domain interactions independently of TADs and insulation**

(A) A schematic illustrating the genotype of the CTCF-AID-GFP cell line (Nora et al., 2017).

(B) Live cell microscopy images of CTCF-AID-GFP cells  $\pm$  auxin (48 h). Scale bar = 10  $\mu$ m (bottom).

(C) Aggregate analysis of Hi-C from CTCF-AID-GFP cells  $\pm$  auxin (Nora et al., 2017) at interactions that persist in the absence of cohesin (n=336).

(D) Capture-C interaction profiles between the *Nkx2-1* promoter and selected proximal and distal RING1B-occupied sites in the CTCF-AID-GFP cells  $\pm$  auxin. RING1B ChIP-seq peaks are shown as blue bars below. The location of the *Nkx2-1* promoter is indicated with a blue arrow/bar and the interactions sites as black bars on the chromosome. Read density corresponds to normalised reads in the capture averaged across 250 DpnII restriction fragments.

(E) Aggregate Capture-C signal in the CTCF-AID-GFP cells  $\pm$  auxin at interactions that persist in the absence of cohesin segregated based on distance from the capture site. Only interactions between polycomb target gene promoters and RING1B occupied sites present in SCC1<sup>DEG</sup> are shown. Read density was normalised to signal at the summit in CTCF-AID-GFP cells without auxin and the x-axis illustrates the distance from the interaction site in DpnII fragments.

(F) Average Hi-C contact strength in the CTCF-AID-GFP cells  $\pm$  auxin at interactions that persist in the absence of cohesin segregated based on distance between the interactions.

#### **Figure 5 – Polycomb chromatin domain interactions are disrupted by cohesin**

(A) Capture-C interaction profiles from *Hoxd10* (top) and *Dlx2* (bottom) viewpoints in Control and SCC1<sup>DEG</sup> lines. RING1B ChIP-Seq peaks are displayed as blue bars and TAD intervals as black bars.

(B) Representative image of RASER-FISH showing signals classed as in contact (top pair 0.0905  $\mu$ m apart) and not in contact (bottom pair 1.1629  $\mu$ m apart). Probes are for *Dlx2* (green) and *HoxD10* (red). Scale bar = 5  $\mu$ m.

(C) Violin plots showing 3D distance measurements between *Dlx2* and *HoxD10* in the indicated cells lines. The dashed lines show the median and interquartile range of between n=376-409 cells for each cell line.

(D) Absolute contact probabilities showing the percent of signals judged as colocalised from observations in (B) (see Methods).

#### **Figure 6 – Increased polycomb chromatin domain association in the absence of cohesin suppresses gene expression**

- (A) An MA plot of gene expression alterations in Scc1-mAID-GFP cells  $\pm$  auxin (6 h). The number of genes with increased or decreased expression ( $p\text{-adj} < 0.05$  and  $> 1.5\text{-fold}$ ) is shown in red. The density of Log<sub>2</sub> Fold changes is shown on the right.
- (B) RING1B binding ( $\pm 1\text{kb}$  from the TSS, blue bars) at gene promoters that show reductions in gene expression following cohesin removal (left) compared to all genes (right). Empirical p-value for RING1B-bound genes enrichment within the downregulated genes:  $p=0$  ( $n=10000$  random tests).
- (C) The magnitude of gene expression change at expressed RING1B bound genes that do (right) or do not (left) interact with another RING1B bound site in Hi-C.
- (D) Hi-C (left at 40 kb and right at 10 kb resolution), cRNA-Seq and RING1B ChIP-Seq for two examples of genes with interactions in Hi-C that are strengthened after cohesin removal and whose gene expression decreases.

### Figure 7 – A model for disruption of polycomb chromatin domain interactions by cohesin and loop extrusion

Polycomb chromatin domains (blue) can interact even when separated by large distances on the chromosome. Cohesin (red circle) can load onto DNA and has been proposed to extrude chromatin. As loop extrusion proceeds it will encounter one of the two interacting polycomb chromatin domains. We propose that the manner in which chromatin is extruded through cohesin could lead to the individualisation of these two previously interacting polycomb chromatin domains and explain the observed effect that cohesin removal has on polycomb chromatin domain interaction in our chromosome conformation capture and single-cell imaging experiments. A key prediction of this model would be that cohesin loading and extrusion near either interacting polycomb chromatin domain would lead to the observed effect.

### Supplementary Figure 1

- (A) A representative western blot for SCC1 in the TIR1 and SCC1-mAID-GFP (=SCC1<sup>DEG</sup>) cell lines  $\pm$  auxin. A wild type cell line is shown for comparison and tubulin is shown as a loading control.
- (B) Genomic distance-dependent contact probability from Hi-C in Control or SCC1<sup>DEG</sup> cells.
- (C) Hi-C in Control and SCC1<sup>DEG</sup> cells at 10 kb resolution.
- (D) Pearson correlation coefficient of chromosome 1 from Control and SCC1<sup>DEG</sup> at 500 kb resolution (left). Bar plot of the genome-wide absolute Pearson correlation for Control and SCC1<sup>DEG</sup> (right).
- (E) RING1B, H2AK119ub1, SUZ12, and H3K27me3 ChIP-seq signal metaplotted at RING1B peaks overlapping with interactions that persist in the absence of cohesin (blue line) or all RING1B peaks (dashed-black line).
- (F) A box plot showing the RING1B peak size at RING1B peaks overlapping interactions that persist in the absence of cohesin (blue right) or all RING1B peaks (grey left).

### Supplementary Figure 2

- (A) A representative western blot for SCC1 and RING1B in the Control and AID-RING1B cell lines  $\pm$  auxin. Tubulin is shown as a loading control.
- (B) Pearson correlation coefficient of chromosome 1 from Control and RING1B<sup>DEG</sup> at 500 kb resolution (left). Bar plot of the genome-wide absolute Pearson correlation for Control and RING1B<sup>DEG</sup> (right).

(C) Hi-C in Control and RING1B<sup>DEG</sup> cells at two regions (top at 5 kb resolution and bottom at 10 kb resolution). Black circles indicate at interactions that persist in the absence of cohesin and RING1B ChIP-seq is displayed above and to the left of the matrices.

### Supplementary Figure 3

(A) Capture-C interaction profiles between the *Nkx2-1* promoter and selected proximal and distal RING1B-occupied sites in the Control and RING1B<sup>DEG</sup> cell lines. RING1B ChIP-seq peaks are shown as blue bars below. The location of the *Nkx2-1* promoter is indicated with a blue arrow/bar and the interactions sites as black bars on the chromosome. Read density corresponds to normalised reads in the capture averaged across 250 DpnII restriction fragments.

(B) Aggregate Capture-C signal in the Control, SCC1<sup>DEG</sup> and RING1B<sup>DEG</sup> cells at interaction sites segregated based on distance from the capture site. Only interactions between polycomb target gene promoters and RING1B occupied sites present in SCC1<sup>DEG</sup> are shown. Read density was normalised to Control signal at the summit and the x-axis illustrates the distance from the interaction site in DpnII fragments.

### Supplementary Figure 4

(A) A representative western blot for CTCF in the CTCF-AID cell lines ± auxin. PCNA is shown as a loading control.

(B) Capture-C signal around *Eomes* and *Hoxb5* gene promoters. Shown are normalized read densities for CTCF-AID +/- AUX (green and black, respectively) and as comparison for SCC1<sup>DEG</sup> (red). Read density corresponds to normalised reads in the capture averaged across 80 DpnII restriction fragments. View point is indicated as a blue triangle. TAD boundaries are shown below.

### Supplementary Figure 5

(A) A representative western blot for SCC1 and RING1B in the TIR1 and AID-RING1B SCC1-mAID-GFP cell lines ± auxin. Tubulin is shown as a loading control.

(B) Capture-C interaction profiles from *Hoxd10* (top) and *Dlx2* (bottom) viewpoints in Control and SCC1<sup>DEG</sup> RING1B<sup>DEG</sup> cell lines. RING1B ChIP-Seq peaks are displayed as blue bars and TAD intervals are as black bars.

(C) Representative *Hoxd10* (red) *Dlx2* (green) RASER-FISH images from the indicated cell lines. Scale bar = 5 µm.

(D) Cumulative frequency distribution of 3D distance measures between *Hoxd10* and *Dlx2* in the indicated cells lines. Measurements as in Figure 5C.

### Supplementary Figure 6

(A) Representative RASER-FISH images illustrating the *Nkx2-3* (green) and *Pax2* (red) loci. Scale bar is 5 µm.

(B) Violin plots showing 3D distance measurements between *Nkx2-3* and *Pax2* in the indicated cells lines. The dashed lines show the median and interquartile range of between n=170-186 cells for each cell line.

(C) Absolute contact probabilities showing the percent of signals judged as colocalised from observations in (B) (see Methods).

(D) Cumulative frequency distribution of 3D distance measures between *Nkx2-3* and *Pax2* in the indicated cells lines. Measurements as in (B).

### Supplementary Figure 7

(A) Density distribution of Log<sub>2</sub> transformed RPKM of transcripts in untreated Scc1-mAID cells. Note the bimodal distribution. Red line marks the threshold (RPKM=0.712) to distinguish expressed from unexpressed genes.

(B) Boxplots show transcriptional levels in untreated Scc1-mAID cells. Transcription is shown for expressed genes with RING1B-occupied promoters that either have no detectable Hi-C interactions in SCC1-AID cells treated with auxin (light blue), or interact with other sites that are RING1B occupied (dark blue). Numbers of genes in each group are indicated below the x-axis.



## Methods

### Cell Culture

Wild type E14 mouse ESCs cells were grown on gelatin-coated plates in DMEM supplemented with 10% FBS, penicillin/streptomycin, 5  $\mu$ M 2-Mercaptoethanol, 2 mM L-glutamine, non-essential amino-acids and 10 ng/mL recombinant Leukaemia-Inhibitory Factor (LIF).

### Cloning

pSpCas9(BB)-2A-Puro (PX459) was used to construct CRISPR/Cas9 vectors (Addgene 48139). The following gRNA oligos were cloned into the BbsI restriction site:

|                 |                      |
|-----------------|----------------------|
| ROSA26          | CGCCCATCTTCTAGAAAGAC |
| SCC1 3'         | CCACGGTTCATATTATCTG  |
| RING1A 5'UTR    | CTCAGCGGAGCCCCGCTTGG |
| RING1A Intron 3 | GCGACCGTGCAGCTGACGTT |
| RING1B 5'       | GCACAGCCTGAGACATTTCT |

For homology directed gene targeting and repair 500-1000 bp homology arms were generated by Gibson Assembly.

### Gene Editing

The coding sequence for *Oryza sativa* TIR1 and a splice acceptor was heterozygously introduced into the ROSA26 locus by cotransfection of pX459 ROSA26 and pUC19 ROSA-TIR1. The resulting ESCs were ROSA-TIR1.

The mini-AID and eGFP was introduced at the C-terminus of SCC1 in ROSA-TIR1 ESCs by cotransfection of pX459 SCC1 3' and pUC19 SCC1-mAID-eGFP. The resulting ESCs were ROSA-TIR1 SCC1-mAID-eGFP (SCC1-AID).

RING1A was deleted from ROSA-TIR1 ESCs by cotransfection of two gRNAs spanning exons 1 to 3 (pX459 RING1A 5' UTR and pX459 RING1A Intron 3). The resulting ESCs were ROSA-TIR1 RING1A $\Delta$ .

Full length AID was introduced at the N-terminus of RING1B in ROSA-TIR1 RING1A $\Delta$  ESCs by cotransfection of pX459 RING1B 5' and pUC19 AID-

RING1B. The resulting ESCs were ROSA-TIR1 RING1A $\Delta$  AID-RING1B (RING1B-AID).

The mini-AID and GFP was introduced at the C-terminus of SCC1 in ROSA-TIR1 RING1A $\Delta$  AID-RING1B ESCs by cotransfection of pX459 SCC1 3' and pUC19 SCC1-mAID-GFP. The resulting ESCs were ROSA-TIR1 RING1A $\Delta$  AID-RING1B SCC1-mAID-GFP (SCC1-AID RING1B-AID).

Cells were transfected using lipofectamine 2000. The next day cells were passaged and transfected cells were selected with puromycin (1  $\mu$ g/ml) for two days. Eight days after puromycin removal, colonies were picked and genotyped by PCR and western blotting.

### **Protein Degradation for Hi-C, Capture-C, RNA-seq and CHIP-Seq**

ESCs were plated on 10 cm dishes one day before treatment. Medium was replaced with equilibrated (37°C and 5% CO<sub>2</sub>) medium containing auxin sodium salt (500  $\mu$ M) (Sigma). The cells were incubated for 6 h or 48h (CTCF-AID) before trypsinisation and cell counting (in auxin containing medium). 100,000 cells were used for Hi-C and the rest for western blotting to confirm protein degradation.

### **Hi-C**

#### ***In situ* Hi-C library generation for low cell input**

We performed *in situ* Hi-C on control (TIR1+Auxin), SCC1<sup>DEG</sup> (SCC1-AID+Auxin), RING1B<sup>DEG</sup> (RING1B-AID+Auxin) ESCs (Díaz et al., 2018) in biological duplicates. 100,000 ESCs were crosslinked in 1% formaldehyde and incubated for 10 min at room temperature with rotation (20 rpm). The reaction was quenched by adding glycine (0.2 M) and incubating for 5 min at room temperature with gentle rotation (20 rpm). Cells were washed three times with 1 ml of cold PBS (centrifuged at 300 g for 5 min at 4°C) and then gently resuspended in 250  $\mu$ l of ice-cold *in situ* Hi-C buffer (10 mM Tris-Cl pH 8.0, 10 mM NaCl, 0.2% IGEPAL CA-630, cOmplete Ultra protease inhibitors) and incubated on ice for 15 min. Samples were then centrifuged and resuspended in 250  $\mu$ l of *in situ* Hi-C buffer. Cells were centrifuged (13,000 g for 5 min at 4°C) and resuspended in 250  $\mu$ l ice-cold 10x NEB2 buffer. Nuclei were centrifuged (13,000 g for 5 min at 4°C) and permeabilised by resuspending

them in 50  $\mu$ l of 0.4% SDS and incubating at 65°C for 10 min. SDS was quenched by adding 25  $\mu$ l of 10% Triton X-100 and 145  $\mu$ l of nuclease-free water and incubated at 37°C for 45 min with shaking (650 rpm). Chromatin was digested by adding 100 U of Mbol in 20  $\mu$ l of 10x NEB2.1 buffer for 90 min at 37°C with rotation. Mbol was heat-inactivated at 62°C for 20 min. The overhangs generated by the restriction enzyme were filled-in by adding a mix of 0.4 mM biotin-14-dATP (Life Technologies), 10 mM dCTP/dGTP/dTTP (0.75  $\mu$ l of each dinucleotide), and 5 U/ $\mu$ l DNA polymerase I Klenow (8  $\mu$ l; New England Biolabs), and incubated for 90 min at 37°C with rotation. DNA fragments were ligated in nuclease-free water (657  $\mu$ l), 10x T4 DNA ligase buffer (120  $\mu$ l), 10% Triton X-100 (100  $\mu$ l), 20 mg/mL BSA (12  $\mu$ l) and 5 Weiss U/ $\mu$ l T4 DNA ligase (5  $\mu$ l in two instalments; Thermo Fisher) by incubating 4 h at 20°C with gentle rotation. Nuclei were centrifuged (2,500 g for 5 min at room temperature) and resuspended in 500  $\mu$ l extraction buffer. Protein was digested with 20  $\mu$ l of 20 mg/mL Proteinase K (Applichem), for 30 min at 55°C with shaking (1,000 rpm). 130  $\mu$ L of 5M NaCl was added followed by overnight incubation at 65°C with shaking (1,000 rpm). Phenol-Chloroform-Isoamyl alcohol (25:24:1; Sigma-aldrich) extracted DNA was resuspended in 30  $\mu$ l of 10mM Tris pH 8.0 (Applichem) and incubated for 15 min at 37°C with 10 mg/ml RNase A (1  $\mu$ l; Applichem). In order to remove biotin from unligated fragments, DNA samples were incubated at 20°C for 4h without rotation in a mix of 10  $\mu$ l of 10x NEB2 buffer (New England Biolabs), 1 mM of a dNTPs mix (10  $\mu$ l), 20 mg/mL BSA (0.5  $\mu$ l), 3 U/ $\mu$ l T4 DNA polymerase (5  $\mu$ l; New England Biolabs) and nuclease-free water (up to 100  $\mu$ l). Samples were sheared using a Covaris S220 instrument (2 cycles, each 50 sec, 10% duty, 4 intensity, 200 cycles/burst). Biotinylated fragments were pulled down using Dynabeads MyOne Streptavidin C1 beads. Libraries were end repaired on beads using the NEBNext Ultra End Repair module (New England Biolabs) and washed twice on 1x B&W (10 mM Tris-Cl pH 7.4, 1 mM EDTA, 2 M NaCl) + 0.1% Triton X-100, resuspended in 50  $\mu$ l and transferred to a 1.5 mL tube. Adaptors for Illumina sequencing was added using the NEBNext® Ultra™ dA-Tailing module (New England Biolabs). Final amplification of the libraries was done in 4 parallel reactions per sample as follows: 10  $\mu$ l of the bead-bound libraries, 25  $\mu$ l of 2x

NEBNext Ultra II Q5 Master Mix, 5  $\mu$ l of 10  $\mu$ M Universal PCR primer, 5  $\mu$ l of 10  $\mu$ M Indexed PCR primer and 10  $\mu$ l of nuclease-free water.

Samples were individually barcoded and amplified for 10 (Tir1+Aux\_Batch1, Ring1B+Aux\_Batch1, Scc1+Aux\_Batch1), 12 (Ring1B+Aux\_Batch3) or 14 (Tir1+Aux\_Batch3, Scc1+Aux\_Batch3) cycles following the program: 98°C for 1 min, (98°C for 10 s, 65°C for 75 s, ramping 1.50°C/s) repeated 10-14 times, 65°C for 5 min, 4°C hold.

The four reactions were combined into one tube and size-selected using Ampure XP beads (Beckman Coulter). Final Hi-C libraries were quantified using Qubit dsDNA HS assay kit and a DNA HS kit on a 2100 Bioanalyzer (Agilent). Libraries were first pooled and shallow sequenced on an Illumina MiSeq (2x84bp paired-end; MiSeq reagent kit v3-150 cycles) to assess library quality. They were then sequenced on an Illumina NextSeq (2x80 bp paired-end; NextSeq 500/550 High Output kit v2-150 cycles).

### **Hi-C Analysis**

For each library, paired-end reads were independently mapped against the mm10 reference genome (UCSC) using Bowtie2 in '--very-sensitive' mode. Unmapped reads were truncated by 8bp and realigned iteratively, until a valid alignment could be found or the truncated read was shorter than 30bp. Only uniquely mapping reads with a mapping quality (MAPQ) $\geq$ 30 were kept in the downstream analysis. Biopython "Restriction" module was then used to compute predicted restriction fragments. Uniquely mapped reads were assigned to fragments, fragments to pairs and pairs filtered for self-ligated fragments, PCR duplicates, read pairs mapping further than 5 kb from the nearest restriction site, and for uninformative ligation products (Cournac et al., 2012). The genome was binned at 10 kb resolution, and Hi-C matrices were built by counting the number of valid fragment pairs per bin. Bins with less than 10% of the median number of fragments per bin were masked before the matrix was normalised using KR matrix balancing per chromosome (Knight and Ruiz, 2012).

### **Observed/expected (OE) Hi-C matrix generation**

Expected Hi-C contact values were obtained by calculating the average contact intensity for all loci with the same distance. The normalized Hi-C matrix is then transformed into an observed/expected (O/E) matrix by dividing each normalized observed by its corresponding expected value at that distance. O/E matrix generation was performed for each chromosome separately.

### **A/B compartment quantification**

A/B compartment calculation was done following a previously described procedure (Lieberman-Aiden:2009; Flyamer et al., 2017). Briefly, O/E matrices for each chromosome at 500 kb resolution were transformed into a correlation matrix by calculating the Pearson correlation of row  $i$  and column  $j$  for each  $(i, j)$ . The first eigenvector of the correlation matrix forms the compartment vector. To ensure that positive values indicate the A (active) compartment and negative values the B (inactive) compartment, we used GC content as a proxy: if the average GC content of regions with negative entries is higher than that of regions with positive entries, the eigenvector sign is inverted. Absolute intra-chromosomal correlation values were compared between conditions as a measurement of compartmentalisation.

### **Hi-C peak calling**

SCC1-AID peaks were called in 100kb resolution matrices using an in-house, CPU implementation of HiCCUPs (Rao et al., 2014). Enrichment and FDR values for each pixel were obtained as described (Rao et al., 2014). Peaks must (i) have a minimum of 2.25-fold enrichment over the donut neighbourhood, (ii) have an  $FDR \leq 0.05$  in the donut neighborhood, (iii) have an  $FDR \leq 0.1$  in the remaining the neighbourhoods, and (iv) have a minimum observed value of 29 contacts in the peak centre. The robustness of these specific values has been confirmed visually for a large number of regions in order to minimise false-positives.

### **Aggregate Hi-C feature analysis (TADs, peaks and A/B compartments)**

Published ESC TAD intervals were used for aggregate TAD analysis (Bonev et al., 2017). For calculating the aggregate TAD and peaks, subsets of the O/E matrices were extracted and averaged to obtain the output sub-matrices. Sub-matrices of different sizes were interpolated using “imresize” with the “nearest”

setting from the Scipy Python package. Using the TAD and peak calls for each of the groups (see the above section “Average Hi-C feature analysis” for parameter details). The aggregate analysis of the O/E matrices were calculated at 10kb resolution for TADs (Flyamer et al., 2017) and at 10 kb resolution for peaks.

### **ChIP-Seq read enrichment quantitation at Hi-C peaks**

Datasets in Supplementary Table S1 were processed using the standard pipeline in the lab (see cChIP-Seq read processing below). Pileups were built using MACS2 and the obtained bedgraph files were used to quantify read count enrichments. Read count enrichments were quantified separately for source and sink of each interaction using the function `annotatePeaks.pl` from HOMER (Heinz et al., 2010) with the options `-size given -raw`. For each peak, an average enrichment was quantified using the mean between source and sink. This was repeated for 1000 distance- and chromosome-matched random source-sink pairs. Fold enrichment was quantified by dividing observed enrichment by the mean enrichment at random source-sink pairs.

### **Capture-C**

#### **Capture-C library generation**

Capture-C libraries were prepared as described previously (Davies et al., 2016).  $10^7$  mouse ES cells were trypsinized, collected in 50ml falcon tubes in 9.3ml media and crosslinked with 1.25 ml 16% formaldehyde for 10 min at room temperature. Cells were quenched with 1.5ml 1 M glycine, washed with PBS and lysed for 20 min at 4°C while rotating (lysis buffer: 10 mM Tris pH 8, 10 mM NaCl, 0.2% NP-40, supplemented with complete proteinase inhibitors) prior to snap freezing in 1 ml lysis buffer at -80°C. Lysates were then thawed on ice, pelleted and resuspended in 650  $\mu$ l 1x DpnII buffer (NEB). Three 1.5ml tubes with 200  $\mu$ l lysate each were treated in parallel with SDS (0.28% final concentration, 1 h, 37°C, interval shaking 500rpm, 30s on/30s off), quenched with trypsin (1.67%, 1h at 37°C, interval shaking 500rpm, 30s on/30sec off) and subjected to a 24 h digestion with 3x10  $\mu$ l recombinant DpnII (37°C, interval shaking 500rpm, 30s on/30s off). Each chromatin aliquot was independently ligated with 8  $\mu$ l T4 Ligase (240 U) in a volume of 1440  $\mu$ l (20 h at 16°C).

Following this, the nuclei containing ligated chromatin were pelleted, reverse-crosslinked and the ligated DNA was phenol-chloroform purified. The sample was resuspended in 300 µl water and sonicated 13x (Bioruptor Pico, 30s on, 30s off) or until a fragment size of approximately 200 bp was reached. Fragments were size selected using AmpureX beads (Beckman Coulter, selection ratios: 0.85x / 0.4x) and the correct size was assessed by Bioanalyzer. 2x 1-5 µg of DNA were adaptor ligated and indexed using the NEBNext DNA library Prep Reagent Set (New England Biolabs: E6040S/L) and NEBNext Multiplex Oligos for Illumina Primer sets 1 (New England) and 2 (New England). The libraries were amplified 7x using Herculase II Fusion Polymerase kit (Agilent).

### **Capture-C hybridization and sequencing**

5' biotinylated probes were designed using the online tool by the Hughes lab (CapSequm) to be 70-120bp long and two probes for each promoter of interest. The probes were pooled at 2.9nM each. Samples were captured twice and hybridizations were carried out for 72h and for 24h for the first and the second captures, respectively. To even out capture differences between tubes, libraries were pooled prior to hybridization. For Control, SCC1<sup>DEG</sup>, RING1B<sup>DEG</sup> and SCC1<sup>DEG</sup> RING1B<sup>DEG</sup>, 1.5µg of each replicate was individually hybridized and then pooled for the second round of hybridization. CTCF +/- AUX were multiplexed prior to the first capture at 2 µg each. Hybridization was carried out using Nimblegen SeqCap (Roche, Nimblegen SeqCap EZ HE-oligo kit A, Nimblegen SeqCap EZ HE-oligo kit B, Nimblegen SeqCap EZ Accessory kit v2, Nimblegen SeqCap EZ Hybridisation and wash kit) following manufacturer's instructions for 72 h followed by a 24 h hybridization (double Capture). The captured library molarity was quantified by qPCR using SensiMix SYBR (Bioline, UK) and KAPA Illumina DNA standards (Roche) and sequenced on Illumina NextSeq 500 platform for three biological replicates.

### **Capture-C data analysis**

Fastq files were aligned to mm10 genome and filtered using HiCUP (v0.5.7) (Wingett et al., 2015) and Bowtie 2 (Langmead et al., 2009) with the settings of 100bp-800bp for fragment sizes. Paired bam files were then processed using the Bioconductor package Chicago (Cairns et al., 2016) (Version: 1.0.4)

according to the Chicago Vignette using the inbuilt mESC-2reps weight settings. Interaction “peaks” were called based on Chicago scores  $\geq 5$  and interaction peaks closer than 10 fragments in distance were combined to one peak. Weighted average read counts were extracted from the ChicagoData objects. For visualization in line plots, for each DpnII fragment, percentage reads per promoter (PRPP) was calculated for each sample to normalize the read counts. Briefly, read counts were divided by the total coverage of reads aligned to captured promoters in the sample, multiplied by the amount of promoters captured and then multiplied by 100 to obtain % reads per promoter captured for each DpnII restriction fragment ( $PRPP = N / cov * nprom * 100$ ). For display purposes reads were then multiplied by 1000 for Figures 3-5 (mPRPP). For aggregate peak analysis (Fig. 3-4) significantly enriched interactions were determined using Chicago default threshold of score  $\geq 5$  at the level of individual DpnII fragments. Because peaks between polycomb occupied sites are larger than the average DpnII fragment, interactions with  $< 10$  DpnII fragments distance were merged to one peak. Peak summits were then defined as the local maximum in the Control sample (if peaks were present in this sample) or in the sample in which they were present. In order to make interactions at different distances comparable, all samples were then normalized to PRPPs at the peak summit in Control. For aggregate analyses in Figures 3-4 only interactions between polycomb target gene promoters and a stringent set of RING1B peaks (Fursova et al., 2019, in press) were considered.

## **Calibrated RNA-Seq and ChIP-Seq**

### **Calibrated total RNA-seq (cRNA-seq)**

To prepare RNA for cRNA-seq, 5 million mouse ESCs (SCC1-AID +/- Auxin) were mixed with 2 million *Drosophila* SG4 cells. Total RNA was extracted using RNeasy Mini Kit (QIAGEN) according to the manufacturer’s protocol, followed by treatment with the TURBO DNA-free Kit (ThermoScientific). Quality of RNA was assessed using 2100 Bioanalyzer RNA 6000 Pico kit (Agilent). To construct libraries, for each sample RNA was first depleted of rRNA using the NEBNext rRNA Depletion kit (NEB). RNA-seq libraries were then prepared from 200 ng of RNA using the NEBNext Ultra II Directional RNA-seq kit (NEB). To quantitate the consistency of spike-in cell mixing for each individual sample,



genomic DNA was isolated from a small aliquot of mixed mouse and fly cells using Quick-DNA Miniprep kit (Zymo Research) according to the manufacturer's protocol. Libraries from 50 ng of genomic DNA were constructed using NEBNext Ultra II FS DNA Library Prep Kit (NEB), following manufacturer's guidelines. NEBNext Multiplex Oligos were used for indexing libraries. The average size of all libraries was analysed using the 2100 Bioanalyzer High Sensitivity DNA Kit (Agilent) and the libraries concentration was measured by qPCR using SensiMix SYBR (Bioline, UK) and KAPA Illumina DNA standards (Roche). cRNA-seq and gDNA-seq libraries were sequenced as 80 bp paired-end reads on the Illumina NextSeq 500 platform for four independent biological replicates.

### **Calibrated ChIP-Seq**

50 million Control or SCC1<sup>DEG</sup> mESCs were mixed with 500,000 HEK293 cells before fixation. Cells were fixed for 10 minutes in 1% formaldehyde at room temperature. Formaldehyde was quenched by the addition of glycine to a final concentration of 125  $\mu$ M. All subsequent steps were as previously described (King and Klose, 2017). Libraries were sequenced for three biological replicates.

### **Massively parallel sequencing, data processing and normalisation**

For cRNA-seq, to filter out reads mapping to rDNA fragments, paired-end reads were aligned using Bowtie 2 (with "--very-fast", "--no-mixed" and "--no-discordant" options) against the concatenated mm10 and dm6 rRNA genomic sequence (GenBank: BK000964.3 and M21017.1). All unmapped reads from this step were then aligned against the genome sequence of concatenated mm10 and dm6 genomes using the STAR aligner (Dobin et al., 2013). Finally, reads that failed to map using STAR were additionally aligned against the mm10+dm6 concatenated genome using Bowtie 2 (with "--sensitive-local", "--no-mixed" and "--no-discordant" options). Uniquely aligned reads from the last two steps were combined for further analysis. PCR duplicates were removed using SAMTools. For cChIP-Seq, we aligned paired-end reads to a concatenated mouse and human genome (mm10+hg19) using Bowtie2 with "--no-mixed" and "--no-discordant" options and SAMBAMBA (Tarasov et al., 2015) was used to filter out PCR duplicates. The mean and standard deviation

of the insert size was calculated using Picard tools. To visualise gene expression changes, uniquely aligned mouse reads were normalised using drosophila (or human for cChIP-Seq) spike-in as described previously (Hu et al., 2015). Briefly, mm10 reads were randomly subsampled based on the total number of dm6 (or hg19) reads in each sample. To account for any minor variations in spike-in cell mixing between replicates, the subsampling factors were additionally corrected using the ratio of dm6 (or hg19)/mm10 total read counts in corresponding gDNA-seq samples. Genome coverage tracks were then generated with genomeCoverageBed from BEDTools (Quinlan, 2014) and visualised using the UCSC genome browser (Kent et al., 2002).

### **Read count quantitation and differential gene expression analysis**

For differential gene expression analysis, a custom-built non-redundant mm10 gene set was used to obtain read counts from original bam files prior to spike-in normalisation using a custom Perl script. To generate the non-redundant mm10 gene set ( $n = 20,633$ ), mm10 refGene genes were filtered to remove very short genes with poor sequence mappability and highly similar transcripts. To identify significant changes in gene expression following auxin treatment, a custom R script utilising DESeq2 package was used (Love et al., 2014). To incorporate spike-in calibration, raw mm10 read counts were normalised using DESeq2 size factors which were calculated based on the read counts for the set of unique dm6 refGene genes as previously described (Taruttis et al., 2017). Prior to quantitation, Drosophila reads were pre-normalised using the actual spike-in ratio (dm6/mm10) which was derived from a corresponding gDNA-seq sample. A threshold of  $p\text{-adj} < 0.05$  and fold change  $> 1.5$  was used to determine significant changes in gene expression. For visualisation normalised read counts were extracted from the DESeq2 table and used to quantify RPKM. These were log2 transformed after addition of a pseudocount of 0.01. Replicate correlations were calculated using the R Bioconductor function `cor(method='spearman')` from the package stats and were  $> 0.99$  throughout. Given the high reproducibility, DESeq2 normalized read counts for the replicates were pooled, RPKM normalized and log2 transformed as described above for visualization in Figure 6.

### **Read count quantitation and enrichment analysis for cChIP-Seq**

For cChIP-Seq analysis, reads were quantified in a custom set of RING1B peaks. Paired reads were quantified using the function `summarizeOverlaps()` from the R Bioconductor package “GenomicFeatures” (Lawrence et al., 2013) with the option `mode="Union"`. A pseudocount of 8 was added prior to log<sub>10</sub> transformation. Replicates were compared using the `cor(method='spearman')` function from the R Bioconductor stats package and were >0.99. For pooled read counts, BAM files were merged using samtools and reads were quantified from merged BAM files using the procedure described above. Metaprofiles were obtained using the `computeMatrix` and `plotHeatmap` functions from deepTools suite (Ramírez et al., 2015).

### **RASER (Resolution After Single-strand Exonuclease Resection)-FISH.**

RASER-FISH was conducted as previously described (Brown et al., 2018) with minor changes. Briefly, cells were labelled for 24 h with BrdU/BrdC mix (3:1) at final conc. of 10 µM, with auxin added at 500 µM for the final 6 h. Cells were fixed in 4% PFA (vol/vol) for 15 min and permeabilised in 0.2% Triton X-100 (vol/vol) for 10 min. Cells were then stained with DAPI (0.5 µg/mL in PBS), exposed to 254 nm wavelength UV light for 15 min, then treated with Exonuclease III (NEB) at 5 U/µL at 37°C for 15 min. Labelled probes (100 ng each) were denatured in hybridization mix at 90°C for 5 min and pre-annealed at 37°C for 10 min. Coverslips were hybridized with prepared probes at 37°C overnight. Following hybridization, coverslips were washed for 30 min twice in 2x SSC at 37°C, once in 1xSSC at RT. Coverslips were blocked in 3% BSA (wt/vol) and digoxigenin was detected with sheep anti-digoxigenin FITC 1/50 (Roche, 11207741910) followed by rabbit anti-sheep FITC 1/100 (Vector Laboratories, FI-6000). Coverslips were stained with DAPI (0.5 µg/mL in PBS), washed with PBS and mounted Vectashield (Vector Laboratories).

### **Probes and nick-translation labelling**

Fosmid probes WIBR1-0935O10 (Nkx2.3 mm9; chr19; 43,659,682-43,698,592), WIBR1-1122P14 (Pax2 mm9; chr19; 44,809,035-44,851,675), WIBR1-1125H10 (Dlx2 mm9; chr2: 71374041-71411685), WIBR1-2777G14 (HoxD10 mm9; chr2: 74511607-74550498) were obtained from BACPAC Resources Center (Children's Hospital Oakland Research Institute; [<https://bacpacresources.org/>]). Probes were labelled for use in FISH by nick

translation as follows: prior to nick translation, 1  $\mu\text{g}$  DNA was treated with RNase (0.02 U) (Sigma), for 30 min at 37°C, nick translation was carried out at 16 °C for 1 h in the following reaction mixture; 50 mM Tris-HCl, 5 mM MgCl<sub>2</sub>, 2.5  $\mu\text{g}$  BSA, 10 mM  $\beta$ -mercaptoethanol, 50 mM dAGC, 20  $\mu\text{M}$  hapten/fluor [digoxigenin-11-dUTP (Sigma); Cy3 dUTP (GE Healthcare)], 15 U recombinant DNase1 (Sigma) and 10 U DNA polymerase I (NEB), made up to a final volume of 50  $\mu\text{l}$  with H<sub>2</sub>O.

### **Imaging Equipment and Settings**

Widefield fluorescence imaging was performed at 20°C on a DeltaVision Elite system (Applied Precision) equipped with a 100x/1.40 NA UPLSAPO oil immersion objective (Olympus), a CoolSnap HQ2 CCD camera (Photometrics), DAPI (excitation 390/18; emission 435/40), FITC (excitation 475/28; emission 525/45) and TRITC (excitation 542/27; emission 593/45) filters. 12-bit image stacks were acquired with a z-step of 150 nm giving a voxel size of 64.5 nm x 64.5 nm x 150 nm. Image restoration was carried out using Huygens deconvolution Classic Maximum Likelihood Estimation (Scientific Volume Imaging B.V.).

### **Image Analysis**

As previously described (Brown et al., 2018). Briefly, 3D distance measurements were made using an in-house script in ImageJ [<https://imagej.net/>]. As a pre-processing step image regions were chromatically corrected to align the green and the red channel images. Parameters for the chromatic correction were calculated through taking measurements from images of 0.1  $\mu\text{m}$  TetraSpeck® (Molecular Probes®) and calculating the apparent offset between images in each colour channel. Cells were only selected for analysis where there was no hint of replicated signal. Signal pairs were manually identified whereupon a 20 x 20 pixel and 7-15 z-step sub-volume was automatically generated centered on the identified location. In each identified region, thresholding was applied to segment the foci. Firstly, the image region was saturated beyond the top 96.5 % intensity level, to reduce the effect of noisy pixels, and then the threshold was calculated as being 90 % of the maximum intensity value of the processed image. This was repeated for both green and red channels. Once segmented, signal centroid

positions were mathematically calculated and the inter-centroid 3D distance measurement was output along with a .png image for visual inspection.

### **Contact probability threshold calculation**

To assess what proportion of our inter-probe distance measurements might be considered as co-incident we applied the following rationale, which is as described (Cattoni et al., 2017). To measure the error in colocalisation precision within a realistic, non-ideal experimental situation, we labelled and hybridised the same fosmid probe with both digoxigenin (detected with FITC) and Cy3 in cells, as per the experimental conditions. The distance range measured between those two colours shows the colocalisation precision error of  $73\text{nm} \pm 38\text{ nm}$  (mean  $\pm$  SD) in our experimental system. From this we conservatively assume that two probes have 99% chance of co-localisation if their separating distances are less than 187 nm (i.e. mean + 3xSD).

### **Antibodies**

RAD21, 1:1000 (Abcam, ab154769), RING1B (western) 1:1000 (Klose Lab), RING1B (ChIP-Seq) 1:1000 (Cell Signalling, 5694), CTCF 1:1000 (Abcam, ab70303) and TUBULIN 1:500 (Abcam, ab6046).

### **Supplementary Table 1 – Datasets analyzed in this study**

#### **References For Methods**

- Bonev, B., Mendelson Cohen, N., Szabo, Q., Fritsch, L., Papadopoulos, G.L., Lubling, Y., Xu, X., Lv, X., Hugnot, J.-P., Tanay, A., Cavalli, G., 2017. Multiscale 3D Genome Rewiring during Mouse Neural Development. *Cell* 171, 557–572.e24. doi:10.1016/j.cell.2017.09.043
- Brown, J.M., Roberts, N.A., Graham, B., Waithe, D., Lagerholm, C., Telenius, J.M., De Ornellas, S., Oudelaar, A.M., Scott, C., Szczerbal, I., Babbs, C., Kassouf, M.T., Hughes, J.R., Higgs, D.R., Buckle, V.J., 2018. A tissue-specific self-interacting chromatin domain forms independently of enhancer-promoter interactions. *Nat Commun* 9, 3849. doi:10.1038/s41467-018-06248-4
- Cairns, J., Freire-Pritchett, P., Wingett, S.W., Varnai, C., Dimond, A., Plagnol, V., Zerbino, D., Schoenfelder, S., Javierre, B.-M., Osborne, C., Fraser, P., Spivakov, M., 2016. CHiCAGO: robust detection of DNA looping interactions in Capture Hi-C data. *Genome Biol.* 17, 127. doi:10.1186/s13059-016-0992-2
- Cattoni, D.I., Cardozo Gizzi, A.M., Georgieva, M., Di Stefano, M., Valeri, A., Chamousset, D., Houbron, C., Déjardin, S., Fiche, J.-B., González, I., Chang, J.-M., Sexton, T., Marti-Renom, M.A., Bantignies, F., Cavalli, G., Nollmann, M., 2017. Single-cell absolute contact probability detection

- reveals chromosomes are organized by multiple low-frequency yet specific interactions. *Nat Commun* 8, 1753. doi:10.1038/s41467-017-01962-x
- Cournac, A., Marie-Nelly, H., Marbouty, M., Koszul, R., Mozziconacci, J., 2012. Normalization of a chromosomal contact map. *BMC Genomics* 13, 436. doi:10.1186/1471-2164-13-436
- Davies, J.O.J., Telenius, J.M., McGowan, S.J., Roberts, N.A., Taylor, S., Higgs, D.R., Hughes, J.R., 2016. Multiplexed analysis of chromosome conformation at vastly improved sensitivity. *Nat Meth* 13, 74–80. doi:10.1038/nmeth.3664
- Díaz, N., Kruse, K., Erdmann, T., Staiger, A.M., Ott, G., Lenz, G., Vaquerizas, J.M., 2018. Chromatin conformation analysis of primary patient tissue using a low input Hi-C method. *Nat Commun* 9, 4938. doi:10.1038/s41467-018-06961-0
- Dobin, A., Davis, C.A., Schlesinger, F., Drenkow, J., Zaleski, C., Jha, S., Batut, P., Chaisson, M., Gingeras, T.R., 2013. STAR: ultrafast universal RNA-seq aligner. *Bioinformatics* 29, 15–21. doi:10.1093/bioinformatics/bts635
- Flyamer, I.M., Gassler, J., Imakaev, M., Brandão, H.B., Ulianov, S.V., Abdennur, N., Razin, S.V., Mirny, L.A., Tachibana-Konwalski, K., 2017. Single-nucleus Hi-C reveals unique chromatin reorganization at oocyte-to-zygote transition. *Nature* 544, 110–114. doi:10.1038/nature21711
- Heinz, S., Benner, C., Spann, N., Bertolino, E., Lin, Y.C., Laslo, P., Cheng, J.X., Murre, C., Singh, H., Glass, C.K., 2010. Simple combinations of lineage-determining transcription factors prime cis-regulatory elements required for macrophage and B cell identities. *Mol. Cell* 38, 576–589. doi:10.1016/j.molcel.2010.05.004
- Hu, B., Petela, N., Kurze, A., Chan, K.-L., Chapard, C., Nasmyth, K., 2015. Biological chromodynamics: a general method for measuring protein occupancy across the genome by calibrating ChIP-seq. *Nucleic Acids Res.* 43, e132. doi:10.1093/nar/gkv670
- Kent, W.J., Sugnet, C.W., Furey, T.S., Roskin, K.M., Pringle, T.H., Zahler, A.M., Haussler, D., 2002. The human genome browser at UCSC. *Genome Res.* 12, 996–1006. doi:10.1101/gr.229102
- King, H.W., Klose, R.J., 2017. The pioneer factor OCT4 requires the chromatin remodeller BRG1 to support gene regulatory element function in mouse embryonic stem cells. *Elife* 6, 380. doi:10.7554/eLife.22631
- Knight, P.A., Ruiz, D., 2012. A fast algorithm for matrix balancing. *imajna* 33, 1029–1047. doi:10.1093/imanum/drs019
- Langmead, B., Trapnell, C., Pop, M., Salzberg, S.L., 2009. Ultrafast and memory-efficient alignment of short DNA sequences to the human genome. *Genome Biol.* 10, R25. doi:10.1186/gb-2009-10-3-r25
- Lawrence, M., Huber, W., Pagès, H., Aboyoun, P., Carlson, M., Gentleman, R., Morgan, M.T., Carey, V.J., 2013. Software for computing and annotating genomic ranges. *PLoS Comput. Biol.* 9, e1003118. doi:10.1371/journal.pcbi.1003118
- Love, M.I., Huber, W., Anders, S., 2014. Moderated estimation of fold change and dispersion for RNA-seq data with DESeq2. *Genome Biol.* 15, 550. doi:10.1186/s13059-014-0550-8

- Quinlan, A.R., 2014. BEDTools: The Swiss-Army Tool for Genome Feature Analysis. *Curr Protoc Bioinformatics* 47, 11.12.1–34.  
doi:10.1002/0471250953.bi1112s47
- Ramírez, F., Lingg, T., Toscano, S., Lam, K.C., Georgiev, P., Chung, H.-R., Lajoie, B.R., de Wit, E., Zhan, Y., de Laat, W., Dekker, J., Manke, T., Akhtar, A., 2015. High-Affinity Sites Form an Interaction Network to Facilitate Spreading of the MSL Complex across the X Chromosome in *Drosophila*. *Mol. Cell* 60, 146–162. doi:10.1016/j.molcel.2015.08.024
- Rao, S.S.P., Huntley, M.H., Durand, N.C., Stamenova, E.K., Bochkov, I.D., Robinson, J.T., Sanborn, A.L., Machol, I., Omer, A.D., Lander, E.S., Aiden, E.L., 2014. A 3D map of the human genome at kilobase resolution reveals principles of chromatin looping. *Cell* 159, 1665–1680.  
doi:10.1016/j.cell.2014.11.021
- Tarasov, A., Vilella, A.J., Cuppen, E., Nijman, I.J., Prins, P., 2015. Sambamba: fast processing of NGS alignment formats. *Bioinformatics* 31, 2032–2034. doi:10.1093/bioinformatics/btv098
- Taruttis, F., Feist, M., Schwarzfischer, P., Gronwald, W., Kube, D., Spang, R., Engelmann, J.C., 2017. External calibration with *Drosophila* whole-cell spike-ins delivers absolute mRNA fold changes from human RNA-Seq and qPCR data. *BioTechniques* 62, 53–61. doi:10.2144/000114514
- Wingett, S., Ewels, P., Furlan-Magaril, M., Nagano, T., Schoenfelder, S., Fraser, P., Andrews, S., 2015. HiCUP: pipeline for mapping and processing Hi-C data. *F1000Res* 4, 1310.  
doi:10.12688/f1000research.7334.1

## Supplementary Table 1 – Dataset analysed in this study

| Name                 | Reference                                                 | GEO      |
|----------------------|-----------------------------------------------------------|----------|
| CDK8 ChIP-Seq        | Dimitrova_and_Klose_Elife_2018 <sup>1</sup>               | GSE98756 |
| RING1B ChIP-Seq      | Blackledge_and_Klose_Cell_2014 <sup>2</sup>               | GSE55698 |
| SUZ12 ChIP-Seq       | Blackledge_and_Klose_Cell_2014 <sup>2</sup>               | GSE55698 |
| H3K27me3 ChIP-Seq    | Blackledge_and_Klose_Cell_2014 <sup>2</sup>               | GSE55698 |
| EZH2 ChIP-Seq        | Blackledge_and_Klose_Cell_2014 <sup>2</sup>               | GSE55698 |
| FBXL19-FS2 ChIP-Seq  | Dimitrova_and_Klose_Elife_2018 <sup>1</sup>               | GSE98756 |
| H3K4me1 ChIP-Seq     | Whyte_and_Young_Nature_2012 <sup>3</sup>                  | GSE27844 |
| CTCF ChIP-Seq        | mouse ENCODE (LICR)                                       |          |
| ESRRB ChIP-Seq       | Chen_and_Ng_Cell_2008 <sup>4</sup>                        | GSE11431 |
| KLF4 ChIP-Seq        | Chen_and_Ng_Cell_2008 <sup>4</sup>                        | GSE11431 |
| NANOG ChIP-Seq       | Whyte_and_Young_Cell_2013 <sup>5</sup>                    | GSE44288 |
| OCT4 ChIP-Seq        | Whyte_and_Young_Cell_2013 <sup>5</sup>                    | GSE44288 |
| SOX2 ChIP-Seq        | Whyte_and_Young_Cell_2013 <sup>5</sup>                    | GSE44288 |
| YY1 ChIP-Seq         | Sigova_and_Young_Science_2015 <sup>6</sup>                | GSE68195 |
| p300 ChIP-Seq        | mouse ENCODE                                              |          |
| CDK8 ChIP-Seq        | Whyte_and_Young_Cell_2013 <sup>5</sup>                    | GSE44288 |
| CDK9 ChIP-Seq        | Whyte_and_Young_Cell_2013 <sup>5</sup>                    | GSE44288 |
| MED1 ChIP-Seq        | Whyte_and_Young_Cell_2013 <sup>5</sup>                    | GSE44288 |
| MED12 ChIP-Seq       | Whyte_and_Young_Cell_2013 <sup>5</sup>                    | GSE44288 |
|                      |                                                           | GSE11534 |
| MED1 ChIP-Seq        | Sun_and_Carey_MolCell_2018 <sup>7</sup>                   | 0        |
|                      |                                                           | GSE11534 |
| MED12 ChIP-Seq       | Sun_and_Carey_MolCell_2018 <sup>7</sup>                   | 0        |
| H3K27ac ChIP-Seq     | Whyte_and_Young_Nature_2012 <sup>3</sup>                  | GSE27844 |
| H3K36me3 ChIP-Seq    | Brookes_and_Pombo_CellStemCell_2012 <sup>8</sup>          | GSE34520 |
| H3K9ac ChIP-Seq      | mouse ENCODE                                              |          |
| H3K4me3 ChIP-Seq     | Brown_and_Klose_CellReports_2017 <sup>9</sup>             | GSE93538 |
| SET1A.T7 ChIP-Seq    | Brown_and_Klose_CellReports_2017 <sup>9</sup>             | GSE93538 |
| MLL2.N.GFP ChIP-Seq  | Denissov_and_Stewart_Development_2014 <sup>10</sup>       | GSE52071 |
| CFP1 ChIP-Seq        | Brown_and_Klose_CellReports_2017 <sup>9</sup>             | GSE93538 |
| POLII_S7P ChIP-Seq   | Brookes_and_Pombo_CellStemCell_2012 <sup>8</sup>          | GSE34520 |
| POLII_S5P ChIP-Seq   | Brookes_and_Pombo_CellStemCell_2012 <sup>8</sup>          | GSE34520 |
| POLII_S2P ChIP-Seq   | Brookes_and_Pombo_CellStemCell_2012 <sup>8</sup>          | GSE34520 |
| POLII_8WG16 ChIP-Seq | Brookes_and_Pombo_CellStemCell_2012 <sup>8</sup>          | GSE34520 |
| TCF3 ChIP-Seq        | Marson_and_Young_Cell_2008 <sup>11</sup>                  | GSE11724 |
| NeuroD1 ChIP-Seq     | Pataskar_and_Tiwari_EmoJ_2016 <sup>12</sup>               | GSE65072 |
| TBX3 ChIP-Seq        | Kartikasari_and_Bhushan_EmoJ_2013 <sup>13</sup>           | GSE44764 |
| ZFP143 ChIP-Seq      | Ngondo-Mbongo_and_Carbon_NAR_2013 <sup>14</sup>           | GSE39263 |
|                      | Savic_and_Myers_GenomeResearch_2015 <sup>15</sup>         |          |
| GABPA ChIP-Seq       |                                                           | GSE72082 |
| FOXD1.FLAG ChIP-Seq  | Respuela_and_Radalglesias_CellStemCell_2016 <sup>16</sup> | GSE70547 |



|                      |                                                           |          |
|----------------------|-----------------------------------------------------------|----------|
| FOXD1.HA ChIP-Seq    | Respuela_and_Radalglesias_CellStemCell_2016 <sup>16</sup> | GSE70547 |
| POU3F1 ChIP-Seq      | Song_and_Jing_GenomData_2015 <sup>17</sup>                | GSE69865 |
| Nur77 ChIP-Seq       | Terranova_and_Stachowiak_PlosOne_2015 <sup>18</sup>       | GSE65698 |
| TEX10.FLAG ChIP-Seq  | Ding_and_Wang_CellStemCell_2015 <sup>19</sup>             | GSE66736 |
| FGFR ChIP-Seq        | Terranova_and_Stachowiak_PlosOne_2015 <sup>18</sup>       | GSE65698 |
| RXRa ChIP-Seq        | Terranova_and_Stachowiak_PlosOne_2015 <sup>18</sup>       | GSE65698 |
| PREP1 ChIP-Seq       | Laurent_and_Penkov_PlosOne_2015 <sup>20</sup>             | GSE63282 |
| UTF1.Biotin ChIP-Seq | Galonska_and_Meissner_StemCellReports_2014 <sup>21</sup>  | GSE53768 |
| UTF1 ChIP-Seq        | Galonska_and_Meissner_StemCellReports_2014 <sup>21</sup>  | GSE53768 |
| RONIN ChIP-Seq       | Hnisz_and_Young_Cell_2013 <sup>22</sup>                   | GSE51522 |
| NR5A2.HA ChIP-Seq    | Heng_and_Ng_CellStemCell_2010 <sup>23</sup>               | GSE19019 |
| ZFX ChIP-Seq         | Chen_and_Ng_Cell_2008 <sup>4</sup>                        | GSE11431 |
| STAT3 ChIP-Seq       | Chen_and_Ng_Cell_2008 <sup>4</sup>                        | GSE11431 |
| TCFCP211 ChIP-Seq    | Chen_and_Ng_Cell_2008 <sup>4</sup>                        | GSE11431 |
| SMAD1 ChIP-Seq       | Chen_and_Ng_Cell_2008 <sup>4</sup>                        | GSE11431 |
| nMYC ChIP-Seq        | Chen_and_Ng_Cell_2008 <sup>4</sup>                        | GSE11431 |
| E2F1 ChIP-Seq        | Chen_and_Ng_Cell_2008 <sup>4</sup>                        | GSE11431 |
| cMYC ChIP-Seq        | Chen_and_Ng_Cell_2008 <sup>4</sup>                        | GSE11431 |
| REST ChIP-Seq        | Whyte_and_Young_Cell_2013 <sup>5</sup>                    | GSE44288 |
| MAX ChIP-Seq         | Krepelova_and_Oliviero_PlosOne_2014 <sup>24</sup>         | GSE48175 |
| H3K9me3 ChIP-Seq     | BulutKarslioglu_and_Jenuwein_MolCell_2014 <sup>25</sup>   | GSE57092 |
| H2AUb1 ChIP-Seq      | Brookes_and_Pombo_CellStemCell_2012 <sup>8</sup>          | GSE34520 |
| H2A.Z ChIP-Seq       | Surface_and_Boyer_CellRep_2016 <sup>26</sup>              | GSE53208 |
| BRG1.TAP ChIP-Seq    | Dieuleveult_and_Gerard_Nature_2016 <sup>27</sup>          | GSE64825 |
| CHD1.TAP ChIP-Seq    | Dieuleveult_and_Gerard_Nature_2016 <sup>27</sup>          | GSE64825 |
| CHD2.TAP ChIP-Seq    | Dieuleveult_and_Gerard_Nature_2016 <sup>27</sup>          | GSE64825 |
| CHD4.TAP ChIP-Seq    | Dieuleveult_and_Gerard_Nature_2016 <sup>27</sup>          | GSE64825 |
| CHD6.TAP ChIP-Seq    | Dieuleveult_and_Gerard_Nature_2016 <sup>27</sup>          | GSE64825 |
| CHD8.TAP ChIP-Seq    | Dieuleveult_and_Gerard_Nature_2016 <sup>27</sup>          | GSE64825 |
| CHD9.TAP ChIP-Seq    | Dieuleveult_and_Gerard_Nature_2016 <sup>27</sup>          | GSE64825 |
| EP400.TAP ChIP-Seq   | Dieuleveult_and_Gerard_Nature_2016 <sup>27</sup>          | GSE64825 |
| FAIRE-Seq            | Dieuleveult_and_Gerard_Nature_2016 <sup>27</sup>          | GSE64825 |
| INO80 ChIP-Seq       | Wang_and_Hu_CellStemCell_2014 <sup>28</sup>               | GSE49137 |
| MNase-Seq            | West_and_Kingston_NatComm_2014 <sup>29</sup>              | GSE59064 |
| KDM2B ChIP-Seq       | Blackledge_and_Klose_Cell_2014                            | GSE55698 |
| HP1.GFP ChIP-Seq     | BulutKarslioglu_and_Jenuwein_MolCell_2014 <sup>25</sup>   | GSE57092 |
| uH2A ChIP-Seq        | Fursova_and_Klose_MolCell_2019 (in press)                 | GSE11962 |
|                      |                                                           | 0        |

|                             |                                 |          |
|-----------------------------|---------------------------------|----------|
| E14_Scc1-<br>AID_AUX_RING1B | This study                      |          |
| E14_Tir1_AUX_RIN<br>G1B     | This study                      |          |
| CTCF-AID +/- AUX<br>Hi-C    | Nora et al., 2017 <sup>30</sup> | GSE98671 |

- 1 Dimitrova, E. *et al.* FBXL19 recruits CDK-Mediator to CpG islands of developmental genes priming them for activation during lineage commitment. *eLife* **7**, doi:10.7554/eLife.37084 (2018).
- 2 Blackledge, N. P. *et al.* Variant PRC1 complex-dependent H2A ubiquitylation drives PRC2 recruitment and polycomb domain formation. *Cell* **157**, 1445-1459, doi:10.1016/j.cell.2014.05.004 (2014).
- 3 Whyte, W. A. *et al.* Enhancer decommissioning by LSD1 during embryonic stem cell differentiation. *Nature* **482**, 221-225, doi:10.1038/nature10805 (2012).
- 4 Chen, X. *et al.* Integration of external signaling pathways with the core transcriptional network in embryonic stem cells. *Cell* **133**, 1106-1117, doi:10.1016/j.cell.2008.04.043 (2008).
- 5 Whyte, W. A. *et al.* Master transcription factors and mediator establish super-enhancers at key cell identity genes. *Cell* **153**, 307-319, doi:10.1016/j.cell.2013.03.035 (2013).
- 6 Sigova, A. A. *et al.* Transcription factor trapping by RNA in gene regulatory elements. *Science* **350**, 978-981, doi:10.1126/science.aad3346 (2015).
- 7 Sun, F. *et al.* Promoter-Enhancer Communication Occurs Primarily within Insulated Neighborhoods. *Mol Cell*, doi:10.1016/j.molcel.2018.10.039 (2018).
- 8 Brookes, E. *et al.* Polycomb associates genome-wide with a specific RNA polymerase II variant, and regulates metabolic genes in ESCs. *Cell stem cell* **10**, 157-170, doi:10.1016/j.stem.2011.12.017 (2012).
- 9 Brown, D. A. *et al.* The SET1 Complex Selects Actively Transcribed Target Genes via Multivalent Interaction with CpG Island Chromatin. *Cell Rep* **20**, 2313-2327, doi:10.1016/j.celrep.2017.08.030 (2017).
- 10 Denissov, S. *et al.* Mll2 is required for H3K4 trimethylation on bivalent promoters in embryonic stem cells, whereas Mll1 is redundant. *Development* **141**, 526-537, doi:10.1242/dev.102681 (2014).
- 11 Marson, A. *et al.* Connecting microRNA genes to the core transcriptional regulatory circuitry of embryonic stem cells. *Cell* **134**, 521-533, doi:10.1016/j.cell.2008.07.020 (2008).
- 12 Pataskar, A. *et al.* NeuroD1 reprograms chromatin and transcription factor landscapes to induce the neuronal program. *The EMBO journal* **35**, 24-45, doi:10.15252/embj.201591206 (2016).
- 13 Kartikasari, A. E. *et al.* The histone demethylase Jmjd3 sequentially associates with the transcription factors Tbx3 and Eomes to drive endoderm differentiation. *The EMBO journal* **32**, 1393-1408, doi:10.1038/emboj.2013.78 (2013).
- 14 Ngondo-Mbongo, R. P., Myslinski, E., Aster, J. C. & Carbon, P. Modulation of gene expression via overlapping binding sites exerted by ZNF143, Notch1 and THAP11. *Nucleic Acids Res* **41**, 4000-4014, doi:10.1093/nar/gkt088 (2013).

- 15 Savic, D. *et al.* CETCh-seq: CRISPR epitope tagging ChIP-seq of DNA-binding proteins. *Genome research* **25**, 1581-1589, doi:10.1101/gr.193540.115 (2015).
- 16 Respuela, P. *et al.* Foxd3 Promotes Exit from Naive Pluripotency through Enhancer Decommissioning and Inhibits Germline Specification. *Cell stem cell* **18**, 118-133, doi:10.1016/j.stem.2015.09.010 (2016).
- 17 Song, L. *et al.* Genome-wide ChIP-seq and RNA-seq analyses of Pou3f1 during mouse pluripotent stem cell neural fate commitment. *Genom Data* **5**, 375-377, doi:10.1016/j.gdata.2015.06.028 (2015).
- 18 Terranova, C. *et al.* Global Developmental Gene Programming Involves a Nuclear Form of Fibroblast Growth Factor Receptor-1 (FGFR1). *PLoS one* **10**, e0123380, doi:10.1371/journal.pone.0123380 (2015).
- 19 Ding, J. *et al.* Tex10 Coordinates Epigenetic Control of Super-Enhancer Activity in Pluripotency and Reprogramming. *Cell stem cell* **16**, 653-668, doi:10.1016/j.stem.2015.04.001 (2015).
- 20 Laurent, A. *et al.* ChIP-Seq and RNA-Seq analyses identify components of the Wnt and Fgf signaling pathways as Prep1 target genes in mouse embryonic stem cells. *PLoS one* **10**, e0122518, doi:10.1371/journal.pone.0122518 (2015).
- 21 Galonska, C., Smith, Z. D. & Meissner, A. In Vivo and in vitro dynamics of undifferentiated embryonic cell transcription factor 1. *Stem Cell Reports* **2**, 245-252, doi:10.1016/j.stemcr.2014.01.007 (2014).
- 22 Hnisz, D. *et al.* Super-enhancers in the control of cell identity and disease. *Cell* **155**, 934-947, doi:10.1016/j.cell.2013.09.053 (2013).
- 23 Heng, J. C. *et al.* The nuclear receptor Nr5a2 can replace Oct4 in the reprogramming of murine somatic cells to pluripotent cells. *Cell stem cell* **6**, 167-174, doi:10.1016/j.stem.2009.12.009 (2010).
- 24 Krepelova, A., Neri, F., Maldotti, M., Rapelli, S. & Oliviero, S. Myc and max genome-wide binding sites analysis links the Myc regulatory network with the polycomb and the core pluripotency networks in mouse embryonic stem cells. *PLoS one* **9**, e88933, doi:10.1371/journal.pone.0088933 (2014).
- 25 Bulut-Karslioglu, A. *et al.* Suv39h-dependent H3K9me3 marks intact retrotransposons and silences LINE elements in mouse embryonic stem cells. *Mol Cell* **55**, 277-290, doi:10.1016/j.molcel.2014.05.029 (2014).
- 26 Surface, L. E. *et al.* H2A.Z.1 Monoubiquitylation Antagonizes BRD2 to Maintain Poised Chromatin in ESCs. *Cell Rep* **14**, 1142-1155, doi:10.1016/j.celrep.2015.12.100 (2016).
- 27 de Dieuleveult, M. *et al.* Genome-wide nucleosome specificity and function of chromatin remodellers in ES cells. *Nature* **530**, 113-116, doi:10.1038/nature16505 (2016).
- 28 Wang, L. *et al.* INO80 facilitates pluripotency gene activation in embryonic stem cell self-renewal, reprogramming, and blastocyst development. *Cell stem cell* **14**, 575-591, doi:10.1016/j.stem.2014.02.013 (2014).
- 29 West, J. A. *et al.* Nucleosomal occupancy changes locally over key regulatory regions during cell differentiation and reprogramming. *Nature communications* **5**, 4719, doi:10.1038/ncomms5719 (2014).
- 30 Nora, E. P. *et al.* Targeted Degradation of CTCF Decouples Local Insulation of Chromosome Domains from Genomic Compartmentalization. *Cell* **169**, 930-944 e922, doi:10.1016/j.cell.2017.05.004 (2017).
